# Supplementary material for: Regression of the Rician Noise Level in 3D Magnetic Resonance Images from the Distribution of the First Significant Digit
Source: MDPI journal article supplement (doi:10.3390/axioms12121117), 2023-12-13
Supplement: s1 [file s1]

# Supplementary Materials: Regression of the Rician Noise Level in 3D Magnetic Resonance Images from the Distribution of the First Significant Digit

Rosa Maza-Quiroga <sup>1,3,†</sup> , Karl Thurnhofer-Hemsi <sup>1,3,†</sup> , Domingo López-Rodríguez <sup>2,3,†</sup>  and Ezequiel López-Rubio <sup>1,3,†\*</sup> 

In this study, two repositories are used, Mindboggle and fastMRI. The following paragraphs show the results regarding each sub-dataset described in the main document.

In the following paragraphs, we will refer to the  $R^2$  value because its interpretation is the clearest. In general, the ranking of the best-performing metrics does not include either M1 or M3 metrics. Therefore, we greatly outperform the prior proposal [29].

HLN repository shows KR as a better model taking into the values of MSE and  $R^2 = 0.9826$ , see Tables S1 and S3. Both determine M4 as the best metric, see Figure 1. MAE shows the combination of M1 + M10 with close results, see Table S2 and Figure S5. Peeking the first three positions of the score of MSE, MAE and  $R^2$ , we can conclude that M4, M10, and M1 + M10 are the three better metrics to predict the Rician noise for the HLN repository. On the other hand, the M1 option is positioned at the bottom of the score, indicating that the metrics used in this analysis outperform the previous results in [29].

With good precision, MAE and  $R^2 = 0.9823$  determine SVR as the best model for the MMRR repository, see Tables S4 and S6. M4 is the best regarding a single input metric, see Figure S1. The metrics M1 and M2 as input in the model are the most successful results, see Figure 2. MSE shows KR as the best model with a value close to SVR (SVR = 2.59; KR = 2.45).

PR is the best model for MSE value and  $R^2 = 0.9141$  for the NKI-RS repository, see Tables S7 and S9. M10 achieves the highest score when evaluating a single input, see Figure S2. The combination of M4 and M6 is the most successful, see Figure 3. On the other hand, MAE shows SVR is the best, see Table S8.

NKI-TRT dataset shows LR as a better model if check MSE and  $R^2 = 0.7059$ , see Tables S10 and S12. M6 is the top-performing metric when considering a single input, see Figure S3. MAE determines that the SVM model is the best, see Table S11. The metrics are similar for MSE and  $R^2$ , and vaguely different for MAE. The model's most significant achievements are attributed to using metrics M6 and M15 as inputs, see Figure 4.

According to the OASIS repository, KR is the most significant model considering the MSE, MAE, and  $R^2 = 0.9545$ , see Tables S13, S14 and S15. M4 outperforms other single input metrics, indicating it is the top performer, see Figure S4. The model performs its highest success when utilizing the metrics M5 and M8 as inputs, see Figure 5.

The AX-T1-1.5 dataset shows KR as a better model taking into the value of  $R^2 = 0.76$ , see Table S18. It determines M8 + M12 as the best metric. Also, MSE determines the same regressor and metrics, see Table S31. MAE indicates this metric as the fifth place. M12 is the best regarding a single input metric, see Figure S6.

The precision of  $R^2 = 0.8687$  determines SVR as the best model for the AX-T1-POST-1.5 repository, see Table S21. The metrics M5 and M9 as input in the model are the most successful results. For MAE, see Figure S7, this metric ranks fifth. On the other hand, M3 is the best regarding a single input metric, S7.

SVR is the best model with the combination of M5 and M10 scored by MSE, MAE, and  $R^2 = 0.8517$  for the Axial-T1-SE dataset, see Tables S22, S23 and S24. Figure S8 shows M6, which is the best regarding a single input metric.

T1-AXIAL dataset shows KR as a better model if check MSE and  $R^2 = 0.9341$ , see Table S25 and S27. The model's most significant achievements are attributed to using metrics M1 and M6 as inputs. M1 is the best for a single input metric, see Figure S9.

According to the T1-AXIAL-POST-GAD repository, KR is the most significant model considering the MSE, MAE, and  $R^2 = 0.9431$ , see Tables S28, S29 and S30. The model

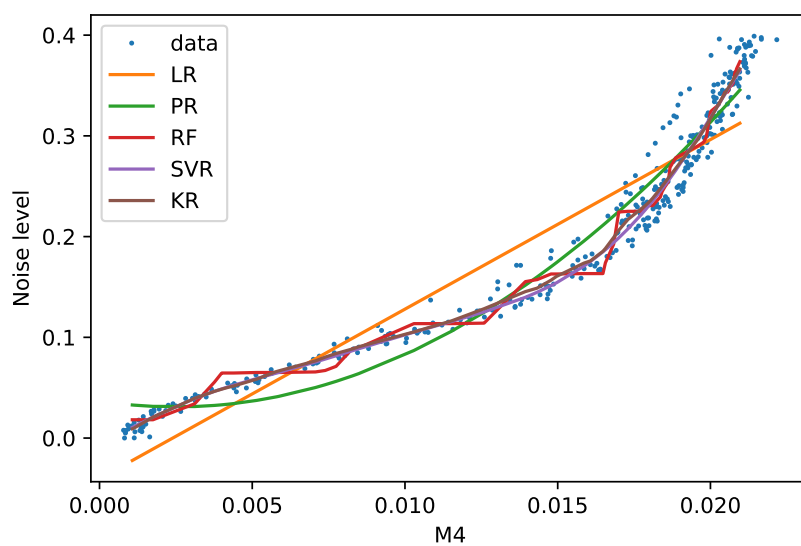

**Figure S1.** M4 training data (blue dots) are displayed along with the five models in MMRR repository.

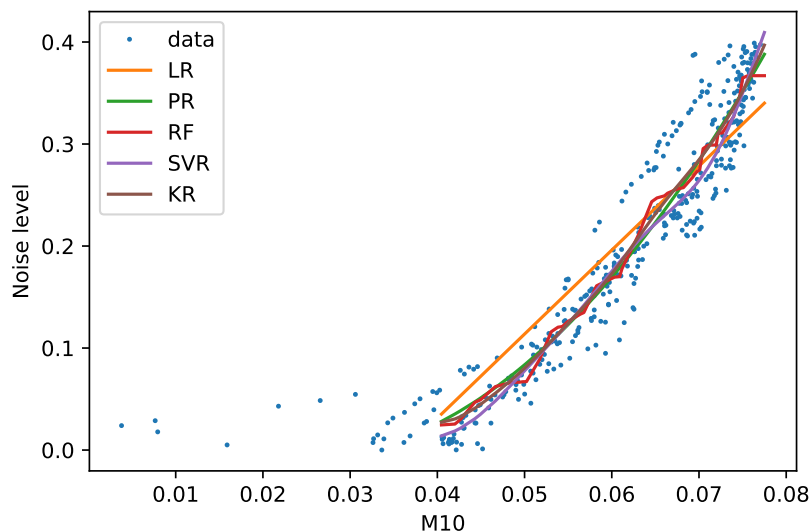

**Figure S2.** M10 training data (blue dots) are displayed along with the five models in NKI-RS repository.

performs its highest success when utilizing the metrics M6 and M10 as inputs. In Figure S10 is represented M10, the best single metric.

AX-T1-3 dataset shows KR as the best model taking into the value of  $MSE$  and  $R^2 = 0.8061$ , see Table S31 and S33. It determines M11 + M13 as the best metric.  $MAE$  shows this metric as third in the score. M6 is the best regarding a single input metric, see Figure S11.

The precision of  $MSE$ ,  $MAE$  and  $R^2 = 0.9465$  determines KR as the best model for the AX-T1-FLASH-POST repository with the metrics M11 and M13, see Tables S34, S35 and S36. M6 demonstrates superiority when only a single input metric is assessed, as illustrated in Figure S12.

The metrics M5 and M10 as input in the model are the most successful results for AX-T1-POST as indicated by  $MSE$ ,  $MAE$ , and  $R^2 = 0.8527$ , see Tables S37, S38 and S39. M1 is the best regarding a single input metric, see Figure S13.

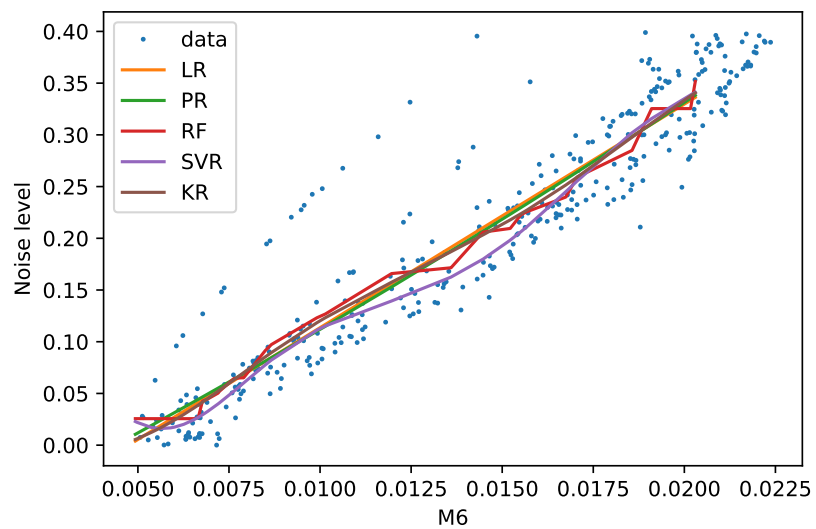

**Figure S3.** M6 training data (blue dots) are displayed along with the five models in NKI-TRT repository.

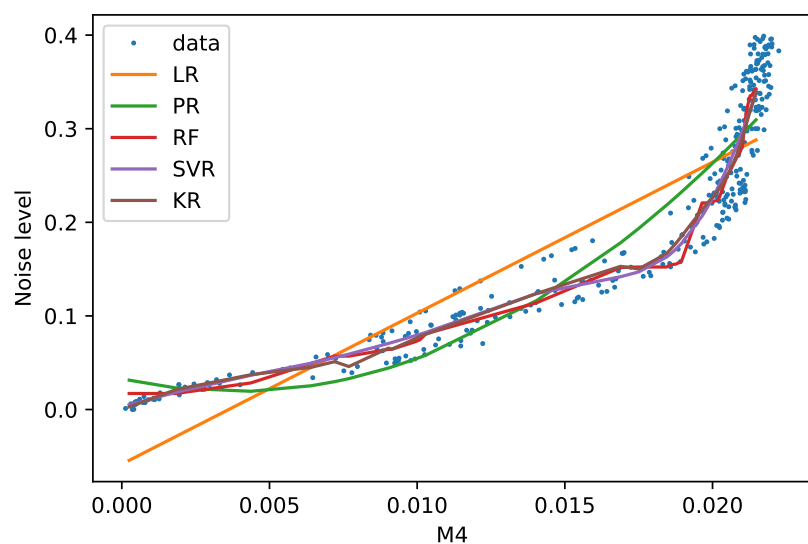

**Figure S4.** M4 training data (blue dots) are displayed along with the five models in OASIS-TRT repository.

**Table S1.** MSE results of the prediction models using the HLN dataset. MSE is multiplied by  $10^{-4}$

| Metrics   | Score | LR    | PR   | RF   | SVR  | KR          |
|-----------|-------|-------|------|------|------|-------------|
| M4        | 120   | 14.05 | 5.25 | 6.30 | 2.55 | <b>2.49</b> |
| M1 + M10  | 119   | 9.81  | 2.71 | 6.16 | 2.66 | 2.54        |
| M10       | 118   | 26.36 | 9.84 | 6.25 | 2.71 | 2.54        |
| M10 + M13 | 117   | 9.87  | 2.82 | 5.94 | 2.67 | 2.59        |
| M1 + M4   | 116   | 14.78 | 3.71 | 6.02 | 2.59 | 2.89        |
| M4 + M13  | 115   | 14.28 | 3.97 | 6.21 | 2.60 | 2.83        |
| M1 + M13  | 114   | 5.73  | 2.72 | 6.10 | 2.61 | 3.01        |
| M1        | 113   | 14.13 | 5.44 | 6.05 | 2.61 | 3.21        |
| M13       | 112   | 14.20 | 5.47 | 6.19 | 2.62 | 3.21        |
| M4 + M10  | 111   | 9.45  | 2.88 | 6.12 | 2.63 | 2.81        |

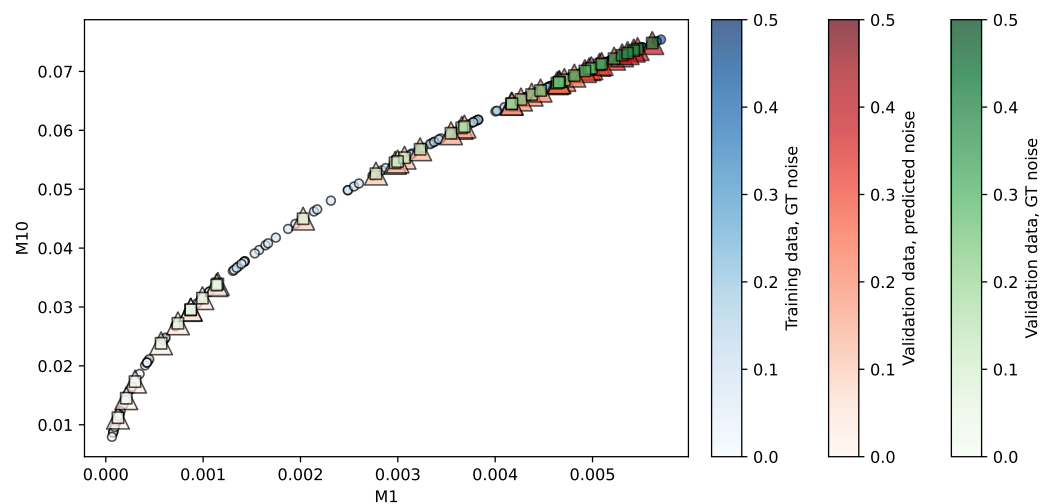

**Figure S5.** Regression on the HLN repository using KR. Predictors are (M1, M10). The opacity of each shape indicates the noise level associated. More details in the main text.

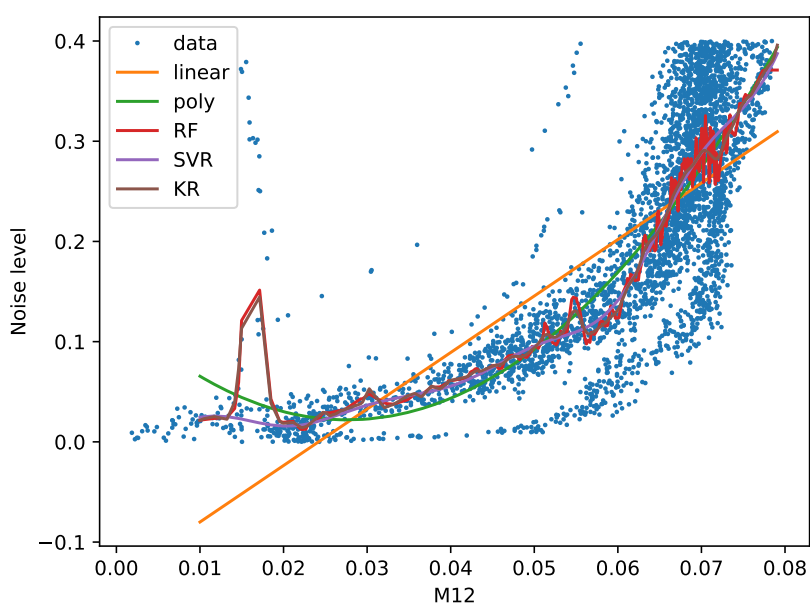

**Figure S6.** M12 training data (blue dots) are displayed along with the five models in the AX-T1 dataset with 1.5 Tesla acquisition.

**Table S2.** MAE results of the prediction models using the HLN dataset. MAE is multiplied by  $10^{-3}$

| Metrics   | Score | LR    | PR    | RF    | SVR   | KR           |
|-----------|-------|-------|-------|-------|-------|--------------|
| M1 + M10  | 120   | 27.50 | 12.06 | 20.91 | 12.05 | <b>11.59</b> |
| M4        | 119   | 32.04 | 19.43 | 21.20 | 11.74 | 11.60        |
| M10 + M13 | 118   | 27.59 | 12.65 | 20.54 | 12.06 | 11.74        |
| M10       | 117   | 44.29 | 27.55 | 21.24 | 12.17 | 11.75        |
| M1 + M4   | 116   | 32.54 | 15.42 | 20.87 | 11.78 | 12.26        |
| M4 + M13  | 115   | 31.47 | 16.20 | 21.12 | 11.80 | 12.19        |
| M1        | 114   | 32.19 | 19.71 | 20.82 | 11.82 | 13.61        |
| M1 + M13  | 113   | 20.19 | 12.29 | 20.91 | 11.83 | 13.05        |
| M13       | 112   | 32.27 | 19.76 | 21.02 | 11.86 | 13.63        |
| M4 + M10  | 111   | 26.93 | 12.48 | 20.87 | 11.91 | 12.32        |

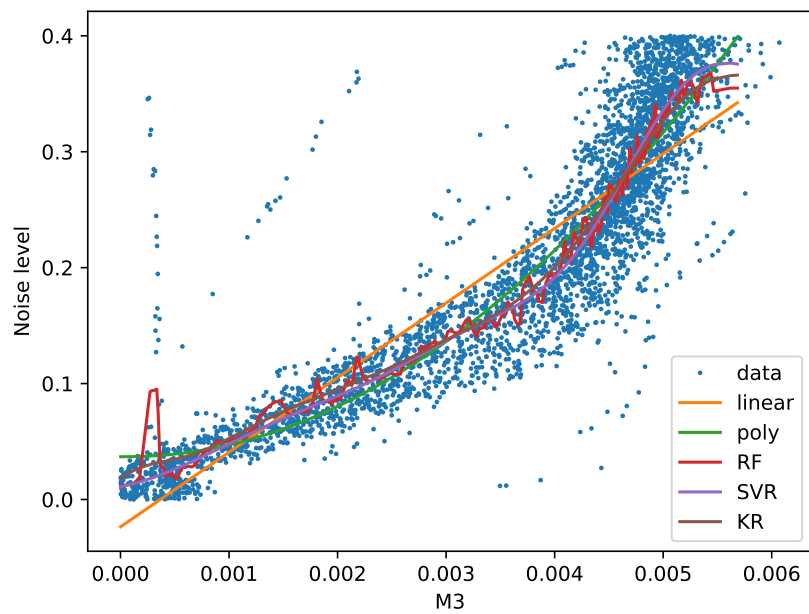

**Figure S7.** M3 training data (blue dots) are displayed along with the five models in the AX-T1-POST dataset with 1.5 Tesla acquisition.

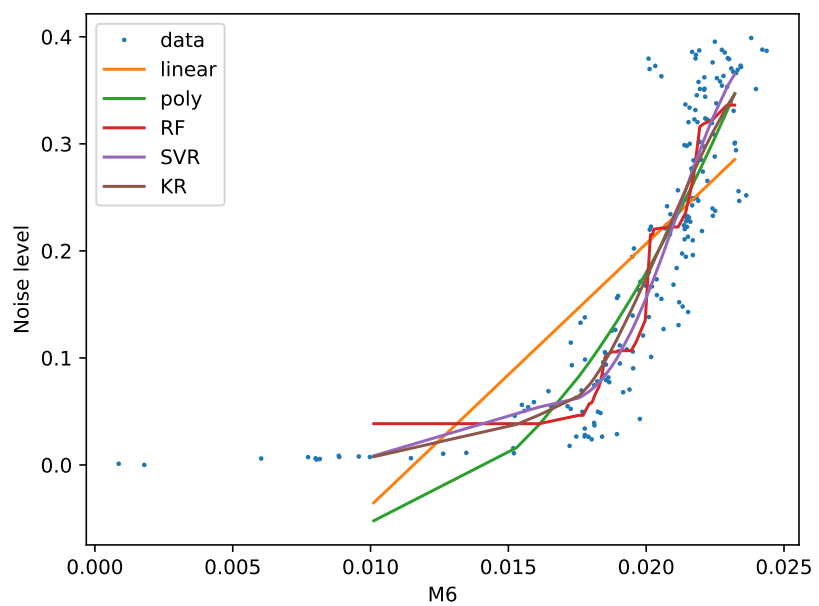

**Figure S8.** M6 training data (blue dots) are displayed along with the five models in the Axial-T1-SE dataset with 1.5 Tesla acquisition.

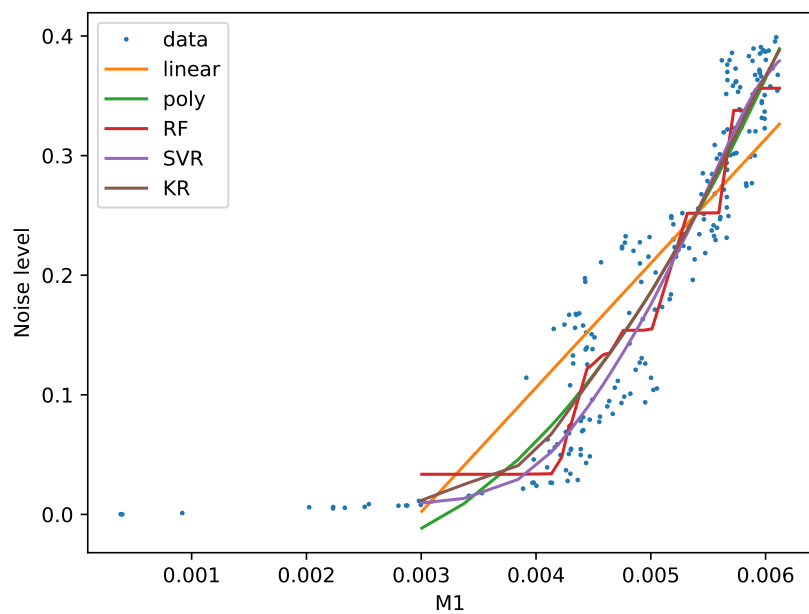

**Figure S9.** M1 training data (blue dots) are displayed along with the five models in the T1-AXIAL dataset with 1.5 Tesla acquisition.

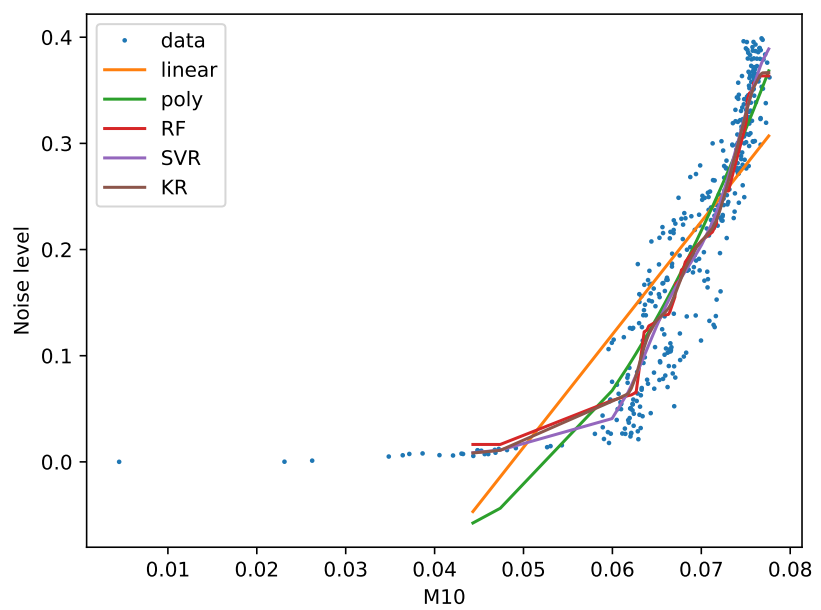

**Figure S10.** M10 training data (blue dots) are displayed along with the five models in the T1-AXIAL-POST-GAD dataset with 1.5 Tesla acquisition.

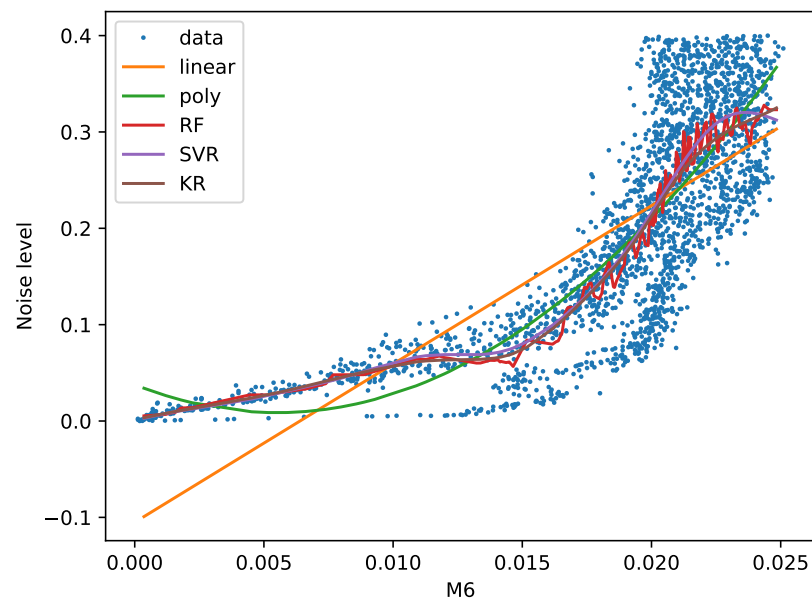

**Figure S11.** M6 training data (blue dots) are displayed along with the five models in the AX-T1 dataset with 3 Tesla acquisitions.

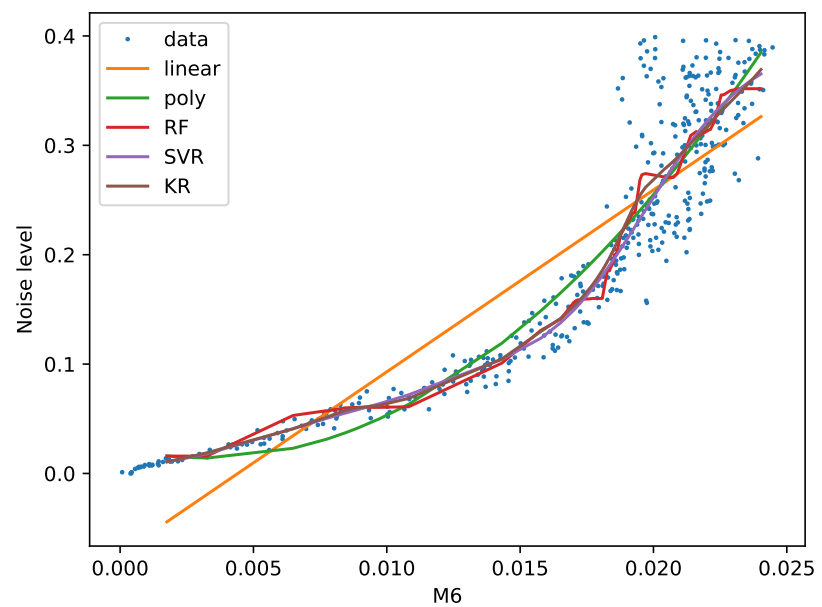

**Figure S12.** M6 training data (blue dots) are displayed along with the five models in the AX-T1-FLASH-POST dataset with 3 Tesla acquisitions.

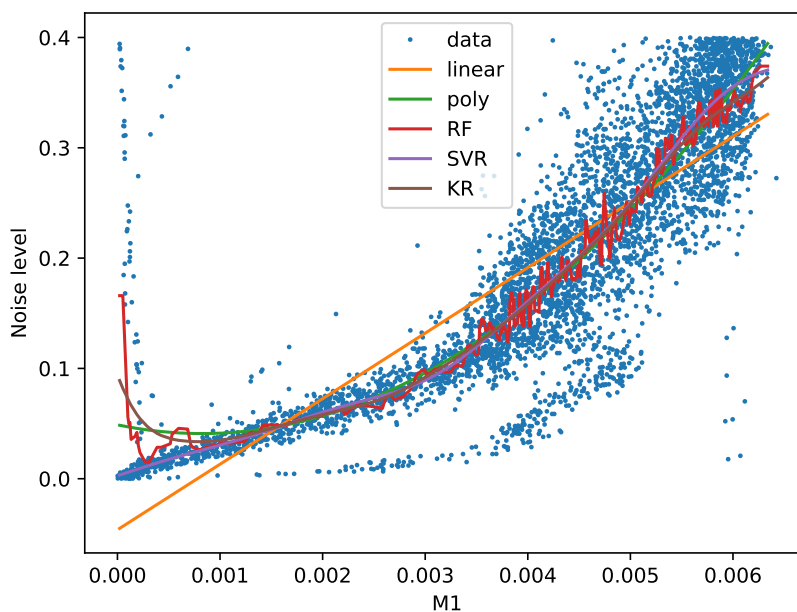

**Figure S13.** M1 training data (blue dots) are displayed along with the five models in the AX-T1-POST dataset with 3 Tesla acquisitions.

**Table S3.**  $R^2$  results of the prediction models using the HLN dataset.

| Metrics   | Score | LR     | PR     | RF     | SVR    | KR            |
|-----------|-------|--------|--------|--------|--------|---------------|
| M4        | 120   | 0.8962 | 0.9615 | 0.9545 | 0.9822 | <b>0.9826</b> |
| M10       | 119   | 0.8069 | 0.9270 | 0.9549 | 0.9810 | 0.9823        |
| M1 + M10  | 118   | 0.9272 | 0.9809 | 0.9556 | 0.9814 | 0.9823        |
| M10 + M13 | 117   | 0.9268 | 0.9802 | 0.9570 | 0.9813 | 0.9820        |
| M1 + M4   | 116   | 0.8908 | 0.9740 | 0.9566 | 0.9819 | 0.9799        |
| M4 + M13  | 115   | 0.8938 | 0.9721 | 0.9554 | 0.9818 | 0.9802        |
| M1 + M13  | 114   | 0.9587 | 0.9811 | 0.9559 | 0.9818 | 0.9788        |
| M1        | 113   | 0.8958 | 0.9601 | 0.9563 | 0.9818 | 0.9768        |
| M13       | 112   | 0.8952 | 0.9599 | 0.9554 | 0.9817 | 0.9767        |
| M4 + M10  | 111   | 0.9297 | 0.9797 | 0.9558 | 0.9816 | 0.9804        |

**Table S4.** MSE results of the prediction models using MMRR dataset. MSE is multiplied by  $10^{-4}$

| Metrics   | Score | LR    | PR   | RF   | SVR  | KR          |
|-----------|-------|-------|------|------|------|-------------|
| M2 + M10  | 120   | 9.82  | 3.72 | 3.54 | 2.59 | <b>2.45</b> |
| M10 + M14 | 119   | 9.88  | 3.73 | 3.64 | 2.58 | 2.48        |
| M1 + M2   | 118   | 11.64 | 3.15 | 3.54 | 2.49 | 2.62        |
| M13 + M14 | 117   | 11.71 | 3.17 | 3.62 | 2.49 | 2.62        |
| M2 + M13  | 116   | 11.65 | 3.17 | 3.63 | 2.49 | 2.62        |
| M1 + M14  | 115   | 11.71 | 3.15 | 3.56 | 2.49 | 2.62        |
| M3 + M13  | 114   | 11.68 | 3.15 | 3.61 | 2.50 | 2.63        |
| M10 + M15 | 113   | 9.88  | 3.71 | 3.57 | 2.61 | 2.50        |
| M1 + M15  | 112   | 11.75 | 3.13 | 3.56 | 2.50 | 2.63        |
| M11 + M13 | 111   | 15.27 | 2.70 | 3.56 | 2.51 | 2.84        |



**Table S5.** MAE results of the prediction models using MMRR dataset. MAE is multiplied by  $10^{-3}$ 

| Metrics   | Score | LR    | PR    | RF    | SVR          | KR    |
|-----------|-------|-------|-------|-------|--------------|-------|
| M1 + M12  | 120   | 32.84 | 12.48 | 14.31 | <b>10.92</b> | 12.06 |
| M12 + M13 | 119   | 32.94 | 12.49 | 14.24 | 10.95        | 12.08 |
| M3 + M13  | 118   | 28.10 | 14.16 | 14.42 | 10.95        | 12.28 |
| M1 + M15  | 117   | 28.23 | 14.11 | 14.36 | 10.95        | 12.29 |
| M1 + M3   | 116   | 28.12 | 14.12 | 14.29 | 10.96        | 12.28 |
| M1 + M11  | 115   | 32.89 | 12.42 | 14.34 | 10.97        | 12.39 |
| M13 + M15 | 114   | 28.21 | 14.15 | 14.30 | 10.97        | 12.29 |
| M1 + M2   | 113   | 28.11 | 14.09 | 14.36 | 10.99        | 12.23 |
| M11 + M13 | 112   | 33.00 | 12.43 | 14.50 | 10.99        | 12.38 |
| M2 + M13  | 111   | 28.10 | 14.13 | 14.60 | 11.01        | 12.23 |

**Table S6.**  $R^2$  results of the prediction models using MMRR dataset.

| Metrics   | Score | LR     | PR     | RF     | SVR           | KR     |
|-----------|-------|--------|--------|--------|---------------|--------|
| M1 + M2   | 120   | 0.9136 | 0.9767 | 0.9740 | <b>0.9823</b> | 0.9809 |
| M13 + M14 | 119   | 0.9130 | 0.9766 | 0.9735 | 0.9822        | 0.9808 |
| M2 + M13  | 118   | 0.9135 | 0.9766 | 0.9734 | 0.9822        | 0.9808 |
| M1 + M14  | 117   | 0.9131 | 0.9768 | 0.9739 | 0.9822        | 0.9808 |
| M3 + M13  | 116   | 0.9133 | 0.9767 | 0.9737 | 0.9822        | 0.9807 |
| M1 + M15  | 115   | 0.9128 | 0.9769 | 0.9739 | 0.9822        | 0.9807 |
| M11 + M13 | 114   | 0.8854 | 0.9802 | 0.9738 | 0.9821        | 0.9791 |
| M1 + M11  | 113   | 0.8861 | 0.9802 | 0.9742 | 0.9821        | 0.9790 |
| M1 + M3   | 112   | 0.9133 | 0.9769 | 0.9738 | 0.9821        | 0.9808 |
| M13 + M15 | 111   | 0.9127 | 0.9768 | 0.9741 | 0.9821        | 0.9807 |

**Table S7.** MSE results of the prediction models using NKI-RS dataset. MSE is multiplied by  $10^{-4}$ 

| Metrics  | Score | LR    | PR           | RF    | SVR   | KR    |
|----------|-------|-------|--------------|-------|-------|-------|
| M4 + M6  | 120   | 17.26 | <b>11.15</b> | 11.54 | 12.08 | 21.51 |
| M4 + M5  | 119   | 17.25 | 11.22        | 11.89 | 11.77 | 19.46 |
| M6 + M13 | 118   | 16.78 | 11.24        | 11.70 | 12.08 | 20.13 |
| M3 + M4  | 117   | 17.25 | 11.25        | 11.50 | 12.15 | 21.17 |
| M4 + M15 | 116   | 17.25 | 11.25        | 11.58 | 12.16 | 21.18 |
| M1 + M6  | 115   | 16.72 | 11.25        | 11.64 | 12.10 | 20.05 |
| M5 + M13 | 114   | 16.77 | 11.33        | 11.85 | 11.76 | 21.43 |
| M2 + M4  | 113   | 17.24 | 11.33        | 11.90 | 11.85 | 20.46 |
| M4 + M14 | 112   | 17.24 | 11.34        | 11.85 | 11.81 | 20.46 |
| M1 + M5  | 111   | 16.71 | 11.34        | 11.96 | 11.76 | 21.36 |

**Table S8.** MAE results of the prediction models using NKI-RS dataset. MAE is multiplied by  $10^{-3}$ 

| Metrics   | Score | LR    | PR    | RF    | SVR          | KR    |
|-----------|-------|-------|-------|-------|--------------|-------|
| M1 + M5   | 120   | 31.96 | 26.81 | 26.94 | <b>25.89</b> | 31.27 |
| M5 + M13  | 119   | 32.01 | 26.80 | 26.84 | 25.91        | 31.27 |
| M4 + M5   | 118   | 32.45 | 26.69 | 26.93 | 25.92        | 30.39 |
| M4 + M14  | 117   | 32.40 | 26.84 | 26.70 | 25.95        | 30.48 |
| M2 + M4   | 116   | 32.40 | 26.83 | 26.78 | 25.98        | 30.49 |
| M13 + M14 | 115   | 31.97 | 26.94 | 26.65 | 26.04        | 29.03 |
| M2 + M13  | 114   | 31.97 | 26.93 | 26.74 | 26.07        | 29.03 |
| M1 + M2   | 113   | 31.92 | 26.95 | 26.91 | 26.07        | 29.02 |
| M4 + M14  | 112   | 31.91 | 26.95 | 26.62 | 26.08        | 29.02 |
| M3 + M13  | 111   | 31.91 | 26.92 | 26.19 | 26.60        | 29.17 |

**Table S9.**  $R^2$  results of the prediction models using NKI-RS dataset.

| Metrics  | Score | LR     | PR            | RF     | SVR    | KR     |
|----------|-------|--------|---------------|--------|--------|--------|
| M4 + M6  | 120   | 0.8734 | <b>0.9141</b> | 0.9113 | 0.9080 | 0.8517 |
| M4 + M5  | 119   | 0.8734 | 0.9135        | 0.9086 | 0.9104 | 0.8638 |
| M3 + M4  | 118   | 0.8735 | 0.9133        | 0.9116 | 0.9075 | 0.8539 |
| M6 + M13 | 117   | 0.8768 | 0.9133        | 0.9100 | 0.9080 | 0.8594 |
| M4 + M15 | 116   | 0.8735 | 0.9133        | 0.9111 | 0.9074 | 0.8538 |
| M1 + M6  | 115   | 0.8772 | 0.9133        | 0.9106 | 0.9078 | 0.8600 |
| M5 + M13 | 114   | 0.8768 | 0.9127        | 0.9089 | 0.9103 | 0.8519 |
| M2 + M4  | 113   | 0.8735 | 0.9127        | 0.9087 | 0.9098 | 0.8583 |
| M4 + M14 | 112   | 0.8735 | 0.9127        | 0.9092 | 0.9101 | 0.8582 |
| M1 + M5  | 111   | 0.8772 | 0.9126        | 0.9080 | 0.9105 | 0.8523 |

**Table S10.** MSE results of the prediction models using NKI-TRT dataset. MSE is multiplied by  $10^{-4}$ 

| Metrics  | Score | LR           | PR    | RF    | SVR   | KR    |
|----------|-------|--------------|-------|-------|-------|-------|
| M6 + M15 | 120   | <b>35.91</b> | 36.52 | 38.70 | 37.47 | 40.73 |
| M3 + M6  | 119   | 36.10        | 36.73 | 38.77 | 37.49 | 40.89 |
| M6 + M14 | 118   | 36.30        | 36.66 | 38.66 | 37.49 | 37.73 |
| M5 + M14 | 117   | 36.35        | 36.97 | 39.00 | 37.73 | 41.34 |
| M2 + M6  | 116   | 36.35        | 36.67 | 38.51 | 37.50 | 37.78 |
| M2 + M5  | 115   | 36.55        | 37.18 | 38.95 | 37.76 | 41.56 |
| M6 + M11 | 114   | 36.61        | 37.42 | 38.80 | 37.61 | 37.60 |
| M6       | 113   | 36.77        | 36.72 | 38.41 | 37.45 | 37.93 |
| M6 + M12 | 112   | 36.78        | 37.29 | 38.47 | 37.49 | 40.03 |
| M5 + M6  | 111   | 36.89        | 37.23 | 38.36 | 37.72 | 37.80 |

**Table S11.** MAE results of the prediction models using NKI-TRT dataset. MAE is multiplied by  $10^{-3}$ 

| Metrics   | Score | LR    | PR    | RF    | SVR          | KR    |
|-----------|-------|-------|-------|-------|--------------|-------|
| M6 + M13  | 120   | 41.61 | 40.05 | 42.03 | <b>36.60</b> | 42.03 |
| M1 + M6   | 119   | 41.60 | 40.04 | 42.18 | 36.62        | 41.81 |
| M13 + M15 | 118   | 41.79 | 40.02 | 42.72 | 36.67        | 41.28 |
| M1 + M15  | 117   | 41.78 | 40.01 | 42.54 | 36.68        | 41.28 |
| M1 + M3   | 116   | 41.77 | 40.02 | 42.75 | 36.68        | 41.28 |
| M3 + M13  | 115   | 41.78 | 40.02 | 42.82 | 36.71        | 41.28 |
| M7 + M10  | 114   | 45.24 | 41.46 | 45.37 | 36.75        | 47.27 |
| M12 + M13 | 113   | 43.13 | 40.79 | 42.59 | 36.77        | 42.73 |
| M1 + M12  | 112   | 43.10 | 40.80 | 42.62 | 36.78        | 42.74 |
| M4 + M6   | 111   | 41.68 | 39.98 | 42.01 | 36.81        | 42.22 |

**Table S12.**  $R^2$  results of the prediction models using NKI-TRT dataset.

| Metrics  | Score | LR            | PR     | RF     | SVR    | KR     |
|----------|-------|---------------|--------|--------|--------|--------|
| M6 + M15 | 120   | <b>0.7059</b> | 0.7010 | 0.6812 | 0.6868 | 0.6659 |
| M3 + M6  | 119   | 0.7043        | 0.6993 | 0.6805 | 0.6866 | 0.6647 |
| M6 + M14 | 118   | 0.7024        | 0.7000 | 0.6816 | 0.6865 | 0.6918 |
| M5 + M14 | 117   | 0.7024        | 0.6975 | 0.6791 | 0.6848 | 0.6614 |
| M2 + M6  | 116   | 0.7020        | 0.6999 | 0.6831 | 0.6865 | 0.6914 |
| M2 + M5  | 115   | 0.7007        | 0.6958 | 0.6793 | 0.6846 | 0.6598 |
| M6 + M11 | 114   | 0.6995        | 0.6926 | 0.6804 | 0.6856 | 0.6924 |
| M6       | 113   | 0.6985        | 0.6988 | 0.6837 | 0.6870 | 0.6888 |
| M6 + M12 | 112   | 0.6984        | 0.6934 | 0.6832 | 0.6868 | 0.6715 |
| M5 + M6  | 111   | 0.6975        | 0.6953 | 0.6840 | 0.6850 | 0.6913 |

**Table S13.** MSE results of the prediction models using OASIS dataset. MSE is multiplied by  $10^{-4}$ 

| Metrics  | Score | LR    | PR    | RF   | SVR   | KR          |
|----------|-------|-------|-------|------|-------|-------------|
| M5 + M8  | 120   | 12.61 | 6.96  | 6.88 | 5.78  | <b>5.77</b> |
| M5 + M9  | 119   | 12.78 | 6.95  | 6.82 | 5.79  | 6.16        |
| M4 + M9  | 118   | 24.33 | 21.14 | 5.94 | 11.47 | 5.88        |
| M4 + M8  | 117   | 24.26 | 21.17 | 6.25 | 11.66 | 5.93        |
| M9 + M13 | 116   | 25.49 | 22.65 | 5.96 | 11.71 | 6.20        |
| M1 + M8  | 115   | 25.40 | 22.71 | 6.07 | 12.01 | 5.98        |
| M8 + M13 | 114   | 25.43 | 22.67 | 6.18 | 12.03 | 5.99        |
| M9 + M10 | 113   | 38.82 | 22.14 | 6.03 | 14.00 | 6.74        |
| M2 + M8  | 112   | 12.49 | 7.17  | 7.03 | 6.14  | 6.03        |
| M6 + M9  | 111   | 12.87 | 7.20  | 7.63 | 6.05  | 6.08        |

**Table S14.** MAE results of the prediction models using OASIS dataset. MAE is multiplied by  $10^{-3}$ 

| Metrics  | Score | LR    | PR    | RF    | SVR   | KR           |
|----------|-------|-------|-------|-------|-------|--------------|
| M4 + M9  | 120   | 39.45 | 33.60 | 18.65 | 24.05 | <b>17.18</b> |
| M4 + M8  | 119   | 39.43 | 33.69 | 19.05 | 24.14 | 17.22        |
| M1 + M8  | 118   | 40.22 | 34.95 | 18.84 | 24.37 | 17.35        |
| M8 + M13 | 117   | 40.25 | 34.92 | 19.06 | 24.39 | 17.36        |
| M5 + M8  | 116   | 29.09 | 20.51 | 20.06 | 18.01 | 17.38        |
| M9 + M13 | 115   | 40.27 | 34.83 | 18.71 | 24.10 | 17.68        |
| M8 + M10 | 114   | 50.37 | 35.97 | 19.17 | 27.71 | 17.70        |
| M1 + M9  | 113   | 40.24 | 34.86 | 18.93 | 24.05 | 17.70        |
| M5 + M9  | 112   | 29.26 | 20.55 | 20.02 | 17.94 | 17.76        |
| M2 + M8  | 111   | 28.88 | 20.86 | 20.29 | 18.52 | 17.86        |

**Table S15.**  $R^2$  results of the prediction models using OASIS dataset.

| Metrics  | Score | LR     | PR     | RF     | SVR    | KR            |
|----------|-------|--------|--------|--------|--------|---------------|
| M5 + M8  | 120   | 0.9046 | 0.9454 | 0.9466 | 0.9539 | <b>0.9545</b> |
| M5 + M9  | 119   | 0.9033 | 0.9454 | 0.9470 | 0.9539 | 0.9521        |
| M4 + M9  | 118   | 0.8212 | 0.8454 | 0.9529 | 0.9115 | 0.9534        |
| M9 + M13 | 117   | 0.8128 | 0.8346 | 0.9531 | 0.9098 | 0.9510        |
| M4 + M8  | 116   | 0.8217 | 0.8452 | 0.9506 | 0.9099 | 0.9530        |
| M1 + M8  | 115   | 0.8134 | 0.8341 | 0.9522 | 0.9076 | 0.9526        |
| M8 + M13 | 114   | 0.8132 | 0.8343 | 0.9513 | 0.9075 | 0.9526        |
| M2 + M8  | 113   | 0.9055 | 0.9439 | 0.9455 | 0.9515 | 0.9526        |
| M9 + M10 | 112   | 0.7128 | 0.8381 | 0.9525 | 0.8943 | 0.9472        |
| M8 + M14 | 111   | 0.7128 | 0.8381 | 0.9525 | 0.8943 | 0.9472        |

**Table S16.** MSE results of the prediction models using AX-T1 dataset. MSE is multiplied by  $10^{-4}$ 

| Metrics  | Score | LR    | PR    | RF    | SVR   | KR           |
|----------|-------|-------|-------|-------|-------|--------------|
| M8 + M12 | 120   | 51.37 | 36.85 | 33.09 | 33.93 | <b>32.52</b> |
| M6 + M8  | 119   | 39.78 | 36.47 | 32.93 | 33.78 | 32.57        |
| M3 + M8  | 118   | 39.67 | 36.52 | 33.20 | 33.71 | 32.80        |
| M8 + M15 | 117   | 39.72 | 36.51 | 33.20 | 33.70 | 32.80        |
| M9 + M12 | 116   | 51.40 | 36.93 | 33.40 | 33.94 | 32.98        |
| M6 + M9  | 115   | 39.89 | 36.66 | 33.19 | 33.72 | 33.12        |
| M8 + M11 | 114   | 51.34 | 36.86 | 33.80 | 34.15 | 33.18        |
| M3 + M9  | 113   | 39.75 | 36.65 | 33.34 | 33.69 | 33.18        |
| M9 + M15 | 112   | 39.80 | 36.65 | 33.30 | 33.69 | 33.19        |
| M5 + M8  | 111   | 39.81 | 36.46 | 33.66 | 33.89 | 33.25        |

**Table S17.** MAE results of the prediction models using AX-T1 dataset. MAE is multiplied by  $10^{-3}$

| Metrics  | Score | LR    | PR    | RF    | SVR          | KR    |
|----------|-------|-------|-------|-------|--------------|-------|
| M6 + M9  | 120   | 47.78 | 44.17 | 41.75 | <b>41.54</b> | 41.95 |
| M9 + M15 | 119   | 47.66 | 44.14 | 41.85 | 41.54        | 41.95 |
| M3 + M9  | 118   | 47.61 | 44.13 | 41.85 | 41.55        | 41.95 |
| M9 + M12 | 117   | 57.36 | 45.13 | 41.88 | 41.62        | 41.74 |
| M8 + M12 | 116   | 57.35 | 44.98 | 41.88 | 41.65        | 41.64 |
| M5 + M8  | 115   | 47.81 | 43.98 | 42.36 | 41.68        | 42.22 |
| M2 + M8  | 114   | 47.67 | 43.98 | 42.41 | 41.68        | 42.29 |
| M8 + M14 | 113   | 47.73 | 43.99 | 42.49 | 41.68        | 42.28 |
| M8 + M11 | 112   | 57.45 | 45.10 | 42.46 | 41.69        | 42.06 |
| M5 + M9  | 111   | 48.14 | 44.41 | 42.63 | 41.74        | 42.37 |

**Table S18.**  $R^2$  results of the prediction models using AX-T1 dataset.

| Metrics  | Score | LR     | PR     | RF     | SVR    | KR            |
|----------|-------|--------|--------|--------|--------|---------------|
| M8 + M12 | 120   | 0.6136 | 0.7232 | 0.7511 | 0.7452 | <b>0.7554</b> |
| M6 + M8  | 119   | 0.7011 | 0.7260 | 0.7523 | 0.7463 | 0.7551        |
| M3 + M8  | 118   | 0.7020 | 0.7257 | 0.7502 | 0.7468 | 0.7533        |
| M8 + M15 | 117   | 0.7016 | 0.7257 | 0.7502 | 0.7468 | 0.7533        |
| M9 + M12 | 116   | 0.6133 | 0.7225 | 0.7487 | 0.7451 | 0.7518        |
| M6 + M9  | 115   | 0.7002 | 0.7246 | 0.7503 | 0.7466 | 0.7508        |
| M8 + M11 | 114   | 0.6138 | 0.7231 | 0.7458 | 0.7437 | 0.7506        |
| M3 + M9  | 113   | 0.7013 | 0.7247 | 0.7492 | 0.7469 | 0.7503        |
| M9 + M15 | 112   | 0.7009 | 0.7247 | 0.7495 | 0.7469 | 0.7502        |
| M5 + M8  | 111   | 0.7009 | 0.7262 | 0.7469 | 0.7455 | 0.7500        |

**Table S19.** MSE results of the prediction models using AX-T1-POST dataset with Tesla 1.5 acquisition. MSE is multiplied by  $10^{-4}$

| Metrics  | Score | LR    | PR    | RF    | SVR          | KR    |
|----------|-------|-------|-------|-------|--------------|-------|
| M5 + M9  | 120   | 22.93 | 18.07 | 18.11 | <b>17.34</b> | 17.84 |
| M9 + M14 | 119   | 22.89 | 18.05 | 18.07 | 17.34        | 17.83 |
| M2 + M9  | 118   | 22.84 | 18.04 | 18.08 | 17.35        | 17.82 |
| M5 + M8  | 117   | 23.06 | 18.00 | 18.12 | 17.36        | 17.99 |
| M8 + M14 | 116   | 23.06 | 18.03 | 18.10 | 17.41        | 18.03 |
| M2 + M8  | 115   | 23.01 | 18.02 | 18.11 | 17.41        | 18.03 |
| M9 + M11 | 114   | 34.84 | 20.40 | 18.10 | 17.46        | 17.84 |
| M8 + M11 | 113   | 35.06 | 20.56 | 18.10 | 17.47        | 18.19 |
| M6 + M9  | 112   | 23.18 | 18.36 | 18.46 | 17.85        | 18.47 |
| M4 + M5  | 111   | 25.96 | 19.44 | 18.70 | 17.90        | 18.00 |

**Table S20.** MAE results of the prediction models using AX-T1-POST dataset with 1.5 Tesla acquisition. MAE is multiplied by  $10^{-3}$

| Metrics  | Score | LR    | PR    | RF    | SVR          | KR    |
|----------|-------|-------|-------|-------|--------------|-------|
| M5 + M8  | 120   | 35.19 | 29.38 | 28.80 | <b>27.47</b> | 28.58 |
| M8 + M14 | 119   | 35.11 | 29.42 | 28.69 | 27.49        | 28.60 |
| M2 + M8  | 118   | 35.05 | 29.41 | 28.70 | 27.49        | 28.60 |
| M2 + M9  | 117   | 35.02 | 29.35 | 28.67 | 27.53        | 28.52 |
| M9 + M14 | 116   | 35.08 | 29.36 | 28.65 | 27.54        | 28.52 |
| M5 + M9  | 115   | 35.19 | 29.37 | 28.76 | 27.58        | 28.57 |
| M8 + M11 | 114   | 47.66 | 32.41 | 28.69 | 27.83        | 28.70 |
| M9 + M11 | 113   | 47.60 | 32.36 | 28.71 | 27.92        | 28.60 |
| M6 + M9  | 112   | 35.25 | 29.71 | 29.20 | 27.94        | 29.15 |
| M9 + M15 | 111   | 35.16 | 29.79 | 29.29 | 27.95        | 29.19 |

**Table S21.**  $R^2$  results of the prediction models using AX-T1-POST dataset with 1.5 Tesla acquisition.

| Metrics  | Score | LR     | PR     | RF     | SVR           | KR     |
|----------|-------|--------|--------|--------|---------------|--------|
| M5 + M9  | 120   | 0.8266 | 0.8632 | 0.8629 | <b>0.8687</b> | 0.8650 |
| M9 + M14 | 119   | 0.8269 | 0.8634 | 0.8632 | 0.8687        | 0.8651 |
| M2 + M9  | 118   | 0.8272 | 0.8634 | 0.8632 | 0.8687        | 0.8651 |
| M5 + M8  | 117   | 0.8257 | 0.8637 | 0.8628 | 0.8686        | 0.8638 |
| M8 + M14 | 116   | 0.8257 | 0.8636 | 0.8629 | 0.8682        | 0.8635 |
| M2 + M8  | 115   | 0.8260 | 0.8636 | 0.8628 | 0.8682        | 0.8635 |
| M9 + M11 | 114   | 0.7369 | 0.8456 | 0.8630 | 0.8678        | 0.8649 |
| M8 + M11 | 113   | 0.7353 | 0.8444 | 0.8629 | 0.8678        | 0.8623 |
| M6 + M9  | 112   | 0.8247 | 0.8610 | 0.8601 | 0.8648        | 0.8601 |
| M4 + M5  | 111   | 0.8036 | 0.8527 | 0.8583 | 0.8644        | 0.8636 |

**Table S22.** MSE results of the prediction models using Axial-T1-SE dataset. MSE is multiplied by  $10^{-4}$

| Metrics   | Score | LR    | PR    | RF    | SVR          | KR    |
|-----------|-------|-------|-------|-------|--------------|-------|
| M5 + M10  | 120   | 63.72 | 31.85 | 36.92 | <b>20.71</b> | 47.97 |
| M2 + M10  | 119   | 64.70 | 32.70 | 39.61 | 20.94        | 34.40 |
| M10 + M14 | 118   | 64.85 | 32.71 | 39.49 | 20.96        | 34.26 |
| M10 + M11 | 117   | 86.04 | 45.80 | 39.52 | 21.29        | 36.94 |
| M5 + M13  | 116   | 67.33 | 27.72 | 37.27 | 21.53        | 24.53 |
| M1 + M5   | 115   | 67.33 | 27.66 | 37.18 | 21.57        | 24.51 |
| M2 + M4   | 114   | 68.08 | 27.84 | 39.18 | 21.91        | 25.02 |
| M4 + M14  | 113   | 68.20 | 27.90 | 40.07 | 21.97        | 25.07 |
| M4 + M5   | 112   | 67.37 | 28.09 | 36.53 | 21.99        | 25.44 |
| M4 + M11  | 111   | 81.69 | 33.89 | 39.35 | 22.43        | 31.53 |

**Table S23.** MAE results of the prediction models using Axial-T1-SE dataset. MAE is multiplied by  $10^{-3}$

| Metrics   | Score | LR    | PR    | RF    | SVR          | KR    |
|-----------|-------|-------|-------|-------|--------------|-------|
| M5 + M10  | 120   | 65.42 | 44.84 | 45.19 | <b>35.57</b> | 43.48 |
| M10 + M14 | 119   | 66.16 | 45.04 | 47.06 | 35.70        | 40.62 |
| M2 + M10  | 118   | 66.08 | 45.01 | 47.17 | 35.72        | 40.53 |
| M10 + M11 | 117   | 75.92 | 53.39 | 47.38 | 35.86        | 42.56 |
| M5 + M13  | 116   | 68.46 | 41.89 | 45.17 | 35.90        | 38.31 |
| M1 + M5   | 115   | 68.47 | 41.84 | 45.13 | 35.97        | 38.30 |
| M4 + M5   | 114   | 68.48 | 42.16 | 45.06 | 36.21        | 38.96 |
| M2 + M4   | 113   | 69.07 | 42.07 | 47.16 | 36.21        | 38.88 |
| M4 + M14  | 112   | 69.13 | 42.10 | 47.44 | 36.23        | 38.90 |
| M5 + M8   | 111   | 67.52 | 43.18 | 45.66 | 36.44        | 43.63 |

**Table S24.**  $R^2$  results of the prediction models using Axial-T1-SE dataset.

| Metrics   | Score | LR     | PR     | RF     | SVR           | KR     |
|-----------|-------|--------|--------|--------|---------------|--------|
| M5 + M10  | 120   | 0.5423 | 0.7809 | 0.7402 | <b>0.8517</b> | 0.6821 |
| M2 + M10  | 119   | 0.5362 | 0.7752 | 0.7219 | 0.8503        | 0.7665 |
| M10 + M14 | 118   | 0.5351 | 0.7750 | 0.7228 | 0.8500        | 0.7677 |
| M5 + M13  | 117   | 0.5142 | 0.8017 | 0.7381 | 0.8467        | 0.8253 |
| M1 + M5   | 116   | 0.5142 | 0.8022 | 0.7377 | 0.8466        | 0.8254 |
| M10 + M11 | 115   | 0.3746 | 0.6793 | 0.7225 | 0.8453        | 0.7500 |
| M2 + M4   | 114   | 0.5095 | 0.8007 | 0.7250 | 0.8440        | 0.8207 |
| M4 + M14  | 113   | 0.5085 | 0.8003 | 0.7182 | 0.8436        | 0.8204 |
| M4 + M5   | 112   | 0.5138 | 0.7997 | 0.7430 | 0.8430        | 0.8190 |
| M4 + M11  | 111   | 0.4119 | 0.7615 | 0.7233 | 0.8390        | 0.7818 |

**Table S25.** MSE results of the prediction models using T1-AXIAL dataset with Tesla 1.5 acquisition. MSE is multiplied by  $10^{-4}$

| Metrics   | Score | LR    | PR    | RF    | SVR  | KR          |
|-----------|-------|-------|-------|-------|------|-------------|
| M1 + M6   | 120   | 42.83 | 12.45 | 12.53 | 9.21 | <b>9.13</b> |
| M6 + M13  | 119   | 43.06 | 12.51 | 12.74 | 9.24 | 9.14        |
| M1 + M5   | 118   | 42.80 | 12.73 | 13.51 | 9.73 | 9.45        |
| M1 + M12  | 117   | 35.87 | 12.05 | 12.52 | 9.45 | 10.63       |
| M1 + M11  | 116   | 36.49 | 12.07 | 12.72 | 9.45 | 11.73       |
| M1 + M15  | 115   | 42.53 | 12.79 | 12.37 | 9.62 | 9.46        |
| M1 + M3   | 114   | 42.56 | 12.81 | 12.40 | 9.59 | 9.46        |
| M5 + M13  | 113   | 43.02 | 12.80 | 13.60 | 9.75 | 9.46        |
| M12 + M13 | 112   | 36.08 | 12.06 | 12.60 | 9.46 | 10.60       |
| M13 + M15 | 111   | 42.76 | 12.86 | 13.21 | 9.62 | 9.47        |

**Table S26.** MAE results of the prediction models using T1-AXIAL dataset with 1.5 Tesla acquisition. MAE is multiplied by  $10^{-3}$

| Metrics   | Score | LR    | PR    | RF    | SVR   | KR           |
|-----------|-------|-------|-------|-------|-------|--------------|
| M12 + M13 | 120   | 49.40 | 28.23 | 28.93 | 23.77 | <b>23.09</b> |
| M1 + M12  | 119   | 49.29 | 28.22 | 28.76 | 23.76 | 23.14        |
| M10 + M14 | 118   | 60.69 | 39.98 | 28.81 | 23.15 | 23.98        |
| M2 + M10  | 117   | 60.67 | 39.99 | 29.01 | 23.15 | 23.74        |
| M2 + M4   | 116   | 52.49 | 30.05 | 30.26 | 23.19 | 24.64        |
| M1 + M11  | 115   | 49.60 | 28.26 | 28.76 | 23.20 | 23.92        |
| M11 + M13 | 114   | 49.71 | 28.27 | 29.61 | 23.21 | 24.02        |
| M10 + M11 | 113   | 61.35 | 35.35 | 28.87 | 23.21 | 24.01        |
| M6 + M10  | 112   | 60.55 | 39.55 | 28.18 | 24.18 | 23.22        |
| M2 + M13  | 111   | 51.58 | 29.46 | 29.36 | 23.24 | 24.12        |

**Table S27.**  $R^2$  results of the prediction models using T1-AXIAL dataset with 1.5 Tesla acquisition.

| Metrics   | Score | LR     | PR     | RF     | SVR    | KR            |
|-----------|-------|--------|--------|--------|--------|---------------|
| M1 + M6   | 120   | 0.6758 | 0.9090 | 0.9105 | 0.9332 | <b>0.9341</b> |
| M6 + M13  | 119   | 0.6740 | 0.9085 | 0.9085 | 0.9331 | 0.9340        |
| M1 + M11  | 118   | 0.7281 | 0.9134 | 0.9086 | 0.9332 | 0.9119        |
| M11 + M13 | 117   | 0.7264 | 0.9133 | 0.9006 | 0.9330 | 0.9098        |
| M10 + M14 | 116   | 0.4868 | 0.8331 | 0.9077 | 0.9328 | 0.9114        |
| M2 + M10  | 115   | 0.4870 | 0.8332 | 0.9072 | 0.9327 | 0.9135        |
| M5 + M10  | 114   | 0.4897 | 0.8337 | 0.9046 | 0.9325 | 0.9107        |
| M1 + M12  | 113   | 0.7331 | 0.9135 | 0.9106 | 0.9323 | 0.9199        |
| M10 + M11 | 112   | 0.5159 | 0.8577 | 0.9081 | 0.9323 | 0.9095        |
| M12 + M13 | 111   | 0.7315 | 0.9134 | 0.9098 | 0.9323 | 0.9200        |

**Table S28.** MSE results of the prediction models using T1-AXIAL-POST-GAD dataset with Tesla 1.5 acquisition. MSE is multiplied by  $10^{-4}$

| Metrics   | Score | LR    | PR    | RF    | SVR  | KR          |
|-----------|-------|-------|-------|-------|------|-------------|
| M6 + M10  | 120   | 50.80 | 60.02 | 11.67 | 8.48 | <b>7.52</b> |
| M3 + M10  | 119   | 51.09 | 58.52 | 10.75 | 8.69 | 7.73        |
| M10 + M15 | 118   | 51.12 | 58.67 | 10.61 | 8.66 | 7.73        |
| M5 + M10  | 117   | 50.60 | 54.75 | 11.14 | 8.75 | 7.83        |
| M1 + M6   | 116   | 32.31 | 8.94  | 11.44 | 7.86 | 9.11        |
| M6 + M13  | 115   | 32.47 | 8.98  | 11.62 | 7.88 | 9.13        |
| M4 + M6   | 114   | 33.56 | 9.27  | 12.32 | 7.95 | 9.51        |
| M1 + M15  | 113   | 32.09 | 9.26  | 10.60 | 7.97 | 9.27        |
| M3 + M13  | 112   | 32.27 | 9.31  | 10.83 | 7.97 | 9.28        |
| M13 + M15 | 111   | 32.25 | 9.29  | 10.70 | 7.98 | 9.28        |

**Table S29.** MAE results of the prediction models using T1-AXIAL-POST-GAD dataset with 1.5 Tesla acquisition. MAE is multiplied by  $10^{-3}$

| Metrics   | Score | LR    | PR    | RF    | SVR   | KR           |
|-----------|-------|-------|-------|-------|-------|--------------|
| M6 + M10  | 120   | 54.20 | 39.58 | 25.27 | 22.24 | <b>21.42</b> |
| M3 + M10  | 119   | 54.26 | 39.57 | 24.82 | 22.41 | 21.63        |
| M10 + M15 | 118   | 54.27 | 39.55 | 24.77 | 22.39 | 21.64        |
| M5 + M10  | 117   | 54.19 | 39.39 | 25.45 | 22.35 | 21.74        |
| M1 + M6   | 116   | 45.22 | 23.73 | 25.20 | 21.82 | 22.91        |
| M6 + M13  | 115   | 45.31 | 23.75 | 25.26 | 21.85 | 22.92        |
| M1 + M12  | 114   | 43.71 | 27.24 | 25.18 | 22.30 | 21.87        |
| M10 + M12 | 113   | 52.44 | 30.60 | 24.86 | 22.44 | 21.91        |
| M4 + M6   | 112   | 46.02 | 23.98 | 25.79 | 21.91 | 23.25        |
| M12 + M13 | 111   | 43.81 | 27.22 | 24.99 | 22.33 | 21.92        |

**Table S30.**  $R^2$  results of the prediction models using T1-AXIAL-POST-GAD dataset with 1.5 Tesla acquisition.

| Metrics   | Score | LR     | PR     | RF     | SVR    | KR            |
|-----------|-------|--------|--------|--------|--------|---------------|
| M6 + M10  | 120   | 0.6160 | 0.4975 | 0.9112 | 0.9346 | <b>0.9431</b> |
| M3 + M10  | 119   | 0.6135 | 0.5107 | 0.9177 | 0.9329 | 0.9412        |
| M10 + M15 | 118   | 0.6133 | 0.5094 | 0.9185 | 0.9331 | 0.9412        |
| M5 + M10  | 117   | 0.6175 | 0.5436 | 0.9147 | 0.9325 | 0.9404        |
| M1 + M6   | 116   | 0.7589 | 0.9321 | 0.9128 | 0.9399 | 0.9301        |
| M6 + M13  | 115   | 0.7578 | 0.9319 | 0.9114 | 0.9398 | 0.9300        |
| M4 + M6   | 114   | 0.7496 | 0.9296 | 0.9060 | 0.9392 | 0.9270        |
| M1 + M15  | 113   | 0.7606 | 0.9297 | 0.9185 | 0.9391 | 0.9290        |
| M3 + M13  | 112   | 0.7593 | 0.9294 | 0.9170 | 0.9390 | 0.9289        |
| M13 + M15 | 111   | 0.7595 | 0.9295 | 0.9178 | 0.9390 | 0.9289        |

**Table S31.** MSE results of the prediction models using AX-T1 dataset with 3 Tesla acquisition. MSE is multiplied by  $10^{-4}$

| Metrics   | Score | LR    | PR    | RF    | SVR   | KR           |
|-----------|-------|-------|-------|-------|-------|--------------|
| M12 + M13 | 120   | 48.78 | 32.89 | 26.90 | 29.65 | <b>25.53</b> |
| M1 + M12  | 119   | 48.65 | 32.89 | 26.81 | 29.65 | 25.53        |
| M11 + M13 | 118   | 49.05 | 32.39 | 26.21 | 29.16 | 25.62        |
| M4 + M11  | 117   | 50.04 | 32.59 | 26.52 | 29.18 | 25.77        |
| M1 + M11  | 116   | 48.93 | 32.40 | 26.22 | 29.15 | 25.83        |
| M6 + M10  | 115   | 54.41 | 37.84 | 27.04 | 29.33 | 25.89        |
| M4 + M12  | 114   | 49.73 | 33.08 | 26.88 | 29.71 | 25.93        |
| M5 + M10  | 113   | 54.84 | 37.73 | 26.55 | 28.87 | 26.06        |
| M10 + M11 | 112   | 64.07 | 35.68 | 26.22 | 29.48 | 26.08        |
| M2 + M13  | 111   | 51.07 | 31.27 | 26.13 | 28.97 | 28.52        |



**Table S32.** MAE results of the prediction models using AX-T1 dataset with 3 Tesla acquisition. MAE is multiplied by  $10^{-3}$

| Metrics   | Score | LR    | PR    | RF    | SVR   | KR           |
|-----------|-------|-------|-------|-------|-------|--------------|
| M11 + M13 | 120   | 55.91 | 45.17 | 39.27 | 41.53 | <b>39.13</b> |
| M2 + M13  | 119   | 59.03 | 45.28 | 39.20 | 41.49 | 41.11        |
| M4 + M11  | 118   | 56.63 | 45.33 | 39.57 | 41.62 | 39.24        |
| M10 + M11 | 117   | 67.19 | 48.54 | 39.26 | 41.77 | 39.52        |
| M12 + M13 | 116   | 55.60 | 45.31 | 39.92 | 41.77 | 39.26        |
| M1 + M12  | 115   | 55.50 | 45.31 | 39.86 | 41.77 | 39.26        |
| M1 + M14  | 114   | 58.94 | 45.26 | 39.30 | 41.48 | 41.10        |
| M1 + M11  | 113   | 55.81 | 45.17 | 39.31 | 41.53 | 39.39        |
| M2 + M10  | 112   | 61.95 | 49.54 | 39.33 | 41.66 | 39.84        |
| M1 + M2   | 111   | 58.95 | 45.26 | 39.33 | 41.50 | 41.10        |

**Table S33.**  $R^2$  results of the prediction models using AX-T1 dataset with 3 Tesla acquisition.

| Metrics   | Score | LR     | PR     | RF     | SVR    | KR            |
|-----------|-------|--------|--------|--------|--------|---------------|
| M12 + M13 | 120   | 0.6290 | 0.7502 | 0.7959 | 0.7748 | <b>0.8061</b> |
| M1 + M12  | 119   | 0.6300 | 0.7502 | 0.7965 | 0.7749 | 0.8061        |
| M11 + M13 | 118   | 0.6270 | 0.7539 | 0.8009 | 0.7785 | 0.8053        |
| M4 + M11  | 117   | 0.6196 | 0.7525 | 0.7986 | 0.7784 | 0.8042        |
| M1 + M11  | 116   | 0.6280 | 0.7539 | 0.8009 | 0.7786 | 0.8038        |
| M6 + M10  | 115   | 0.5868 | 0.7125 | 0.7948 | 0.7772 | 0.8033        |
| M4 + M12  | 114   | 0.6218 | 0.7488 | 0.7959 | 0.7744 | 0.8032        |
| M5 + M10  | 113   | 0.5833 | 0.7132 | 0.7983 | 0.7807 | 0.8020        |
| M10 + M11 | 112   | 0.5127 | 0.7289 | 0.8009 | 0.7761 | 0.8018        |
| M2 + M13  | 111   | 0.6117 | 0.7625 | 0.8015 | 0.7799 | 0.7834        |

**Table S34.** MSE results of the prediction models using AX-T1-FLASH-POST dataset with 3 Tesla acquisition. MSE is multiplied by  $10^{-4}$

| Metrics   | Score | LR    | PR    | RF    | SVR  | KR          |
|-----------|-------|-------|-------|-------|------|-------------|
| M11 + M13 | 120   | 24.92 | 11.63 | 10.06 | 8.03 | <b>7.41</b> |
| M10 + M11 | 119   | 41.82 | 12.93 | 10.12 | 8.52 | 7.42        |
| M1 + M11  | 118   | 24.78 | 11.62 | 10.06 | 7.98 | 7.44        |
| M4 + M11  | 117   | 25.88 | 11.82 | 10.30 | 8.09 | 7.50        |
| M5 + M13  | 116   | 26.21 | 8.50  | 9.38  | 7.51 | 8.20        |
| M1 + M5   | 115   | 26.13 | 8.50  | 9.35  | 7.52 | 8.18        |
| M13 + M14 | 114   | 26.42 | 8.54  | 10.04 | 7.59 | 9.63        |
| M1 + M2   | 113   | 26.31 | 8.53  | 10.11 | 7.59 | 9.62        |
| M1 + M14  | 112   | 26.34 | 8.55  | 10.01 | 7.59 | 9.62        |
| M5 + M10  | 111   | 26.28 | 12.66 | 9.43  | 8.09 | 7.60        |

**Table S35.** MAE results of the prediction models using AX-T1-FLASH-POST dataset with 3 Tesla acquisition. MAE is multiplied by  $10^{-3}$

| Metrics   | Score | LR    | PR    | RF    | SVR   | KR           |
|-----------|-------|-------|-------|-------|-------|--------------|
| M11 + M13 | 120   | 40.74 | 26.31 | 22.42 | 19.95 | <b>18.90</b> |
| M1 + M11  | 119   | 40.60 | 26.29 | 22.50 | 19.89 | 18.95        |
| M10 + M11 | 118   | 55.86 | 29.09 | 22.52 | 20.60 | 18.96        |
| M4 + M11  | 117   | 41.61 | 26.58 | 22.75 | 20.05 | 18.96        |
| M5 + M10  | 116   | 41.68 | 27.37 | 21.95 | 20.16 | 19.10        |
| M2 + M10  | 115   | 42.55 | 28.00 | 22.49 | 20.09 | 19.10        |
| M10 + M14 | 114   | 42.61 | 27.98 | 22.60 | 20.10 | 19.11        |
| M4 + M5   | 113   | 43.98 | 22.81 | 22.16 | 19.60 | 19.39        |
| M1 + M5   | 112   | 43.47 | 22.59 | 21.88 | 19.41 | 19.64        |
| M5 + M13  | 111   | 43.54 | 22.59 | 21.88 | 19.41 | 19.67        |

**Table S36.**  $R^2$  results of the prediction models using AX-T1-FLASH-POST dataset with 3 Tesla acquisition.

| Metrics   | Score | LR     | PR     | RF     | SVR    | KR            |
|-----------|-------|--------|--------|--------|--------|---------------|
| M11 + M13 | 120   | 0.8207 | 0.9166 | 0.9278 | 0.9423 | <b>0.9465</b> |
| M10 + M11 | 119   | 0.6948 | 0.9054 | 0.9275 | 0.9387 | 0.9464        |
| M1 + M11  | 118   | 0.8217 | 0.9166 | 0.9279 | 0.9427 | 0.9462        |
| M4 + M11  | 117   | 0.8135 | 0.9152 | 0.9261 | 0.9418 | 0.9458        |
| M5 + M13  | 116   | 0.8094 | 0.9380 | 0.9330 | 0.9457 | 0.9409        |
| M1 + M5   | 115   | 0.8100 | 0.9380 | 0.9332 | 0.9457 | 0.9410        |
| M13 + M14 | 114   | 0.8080 | 0.9378 | 0.9281 | 0.9452 | 0.9310        |
| M1 + M2   | 113   | 0.8088 | 0.9379 | 0.9275 | 0.9452 | 0.9311        |
| M1 + M14  | 112   | 0.8086 | 0.9377 | 0.9282 | 0.9452 | 0.9311        |
| M2 + M13  | 111   | 0.8082 | 0.9379 | 0.9291 | 0.9450 | 0.9310        |

**Table S37.** MSE results of the prediction models using AX-T1-POST dataset with 3 Tesla acquisition. MSE is multiplied by  $10^{-4}$

| Metrics   | Score | LR    | PR    | RF    | SVR   | KR           |
|-----------|-------|-------|-------|-------|-------|--------------|
| M5 + M10  | 120   | 44.78 | 30.68 | 22.19 | 23.16 | <b>19.46</b> |
| M10 + M14 | 119   | 45.41 | 31.50 | 22.30 | 23.25 | 19.81        |
| M2 + M10  | 118   | 45.34 | 31.31 | 22.36 | 23.27 | 19.83        |
| M3 + M10  | 117   | 46.62 | 40.16 | 22.65 | 24.05 | 21.16        |
| M10 + M15 | 116   | 46.69 | 40.76 | 22.67 | 24.04 | 21.18        |
| M4 + M5   | 115   | 40.05 | 72.96 | 22.20 | 22.88 | 26.48        |
| M5 + M13  | 114   | 39.47 | 66.46 | 22.23 | 22.80 | 25.81        |
| M1 + M5   | 113   | 39.38 | 66.03 | 22.25 | 22.79 | 25.72        |
| M2 + M4   | 112   | 40.12 | 72.66 | 22.26 | 22.95 | 25.90        |
| M10 + M11 | 111   | 56.00 | 89.27 | 22.29 | 24.72 | 33.75        |

**Table S38.** MAE results of the prediction models using AX-T1-POST dataset with 3 Tesla acquisition. MAE is multiplied by  $10^{-3}$ 

| Metrics   | Score | LR    | PR    | RF    | SVR   | KR           |
|-----------|-------|-------|-------|-------|-------|--------------|
| M5 + M10  | 120   | 49.68 | 38.05 | 32.31 | 31.87 | <b>31.43</b> |
| M10 + M14 | 119   | 50.19 | 38.26 | 32.43 | 31.95 | 31.59        |
| M2 + M10  | 118   | 50.13 | 38.24 | 32.42 | 31.96 | 31.59        |
| M1 + M5   | 117   | 45.96 | 39.06 | 32.35 | 31.61 | 33.54        |
| M5 + M13  | 116   | 46.05 | 39.11 | 32.32 | 31.61 | 33.55        |
| M4 + M5   | 115   | 46.64 | 39.58 | 32.32 | 31.65 | 33.72        |
| M1 + M14  | 114   | 45.93 | 39.14 | 32.47 | 31.67 | 33.51        |
| M2 + M13  | 113   | 46.02 | 39.20 | 32.46 | 31.68 | 33.53        |
| M1 + M2   | 112   | 45.93 | 39.15 | 32.44 | 31.68 | 33.51        |
| M13 + M14 | 111   | 46.02 | 39.18 | 32.46 | 31.68 | 33.52        |

**Table S39.**  $R^2$  results of the prediction models using AX-T1-POST dataset with 3 Tesla acquisition.

| Metrics   | Score | LR     | PR     | RF     | SVR    | KR            |
|-----------|-------|--------|--------|--------|--------|---------------|
| M5 + M10  | 120   | 0.6598 | 0.7682 | 0.8321 | 0.8241 | <b>0.8527</b> |
| M10 + M14 | 119   | 0.6550 | 0.7621 | 0.8312 | 0.8234 | 0.8500        |
| M2 + M10  | 118   | 0.6555 | 0.7635 | 0.8308 | 0.8232 | 0.8499        |
| M3 + M10  | 117   | 0.6461 | 0.6984 | 0.8287 | 0.8173 | 0.8401        |
| M10 + M15 | 116   | 0.6456 | 0.6939 | 0.8286 | 0.8174 | 0.8399        |
| M4 + M5   | 115   | 0.6960 | 0.4573 | 0.8320 | 0.8262 | 0.8002        |
| M5 + M13  | 114   | 0.7005 | 0.5052 | 0.8318 | 0.8268 | 0.8052        |
| M1 + M5   | 113   | 0.7012 | 0.5084 | 0.8316 | 0.8269 | 0.8059        |
| M2 + M4   | 112   | 0.6955 | 0.4595 | 0.8315 | 0.8256 | 0.8045        |
| M10 + M11 | 111   | 0.5752 | 0.3369 | 0.8313 | 0.8126 | 0.7474        |
