# Supplementary figures and images for: Regression of the Rician Noise Level in 3D Magnetic Resonance Images from the Distribution of the First Significant Digit
Source: MDPI journal article supplement (doi:10.3390/axioms12121117), 2023-12-13

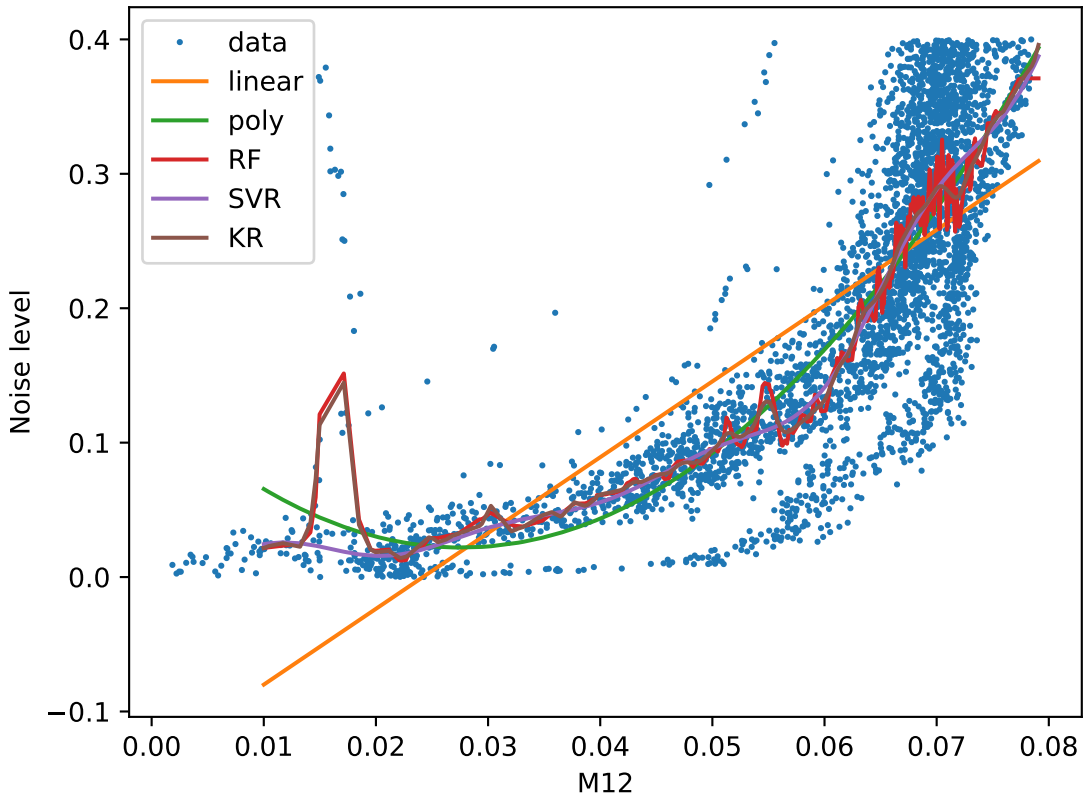

Supplement: s1 [file s1]

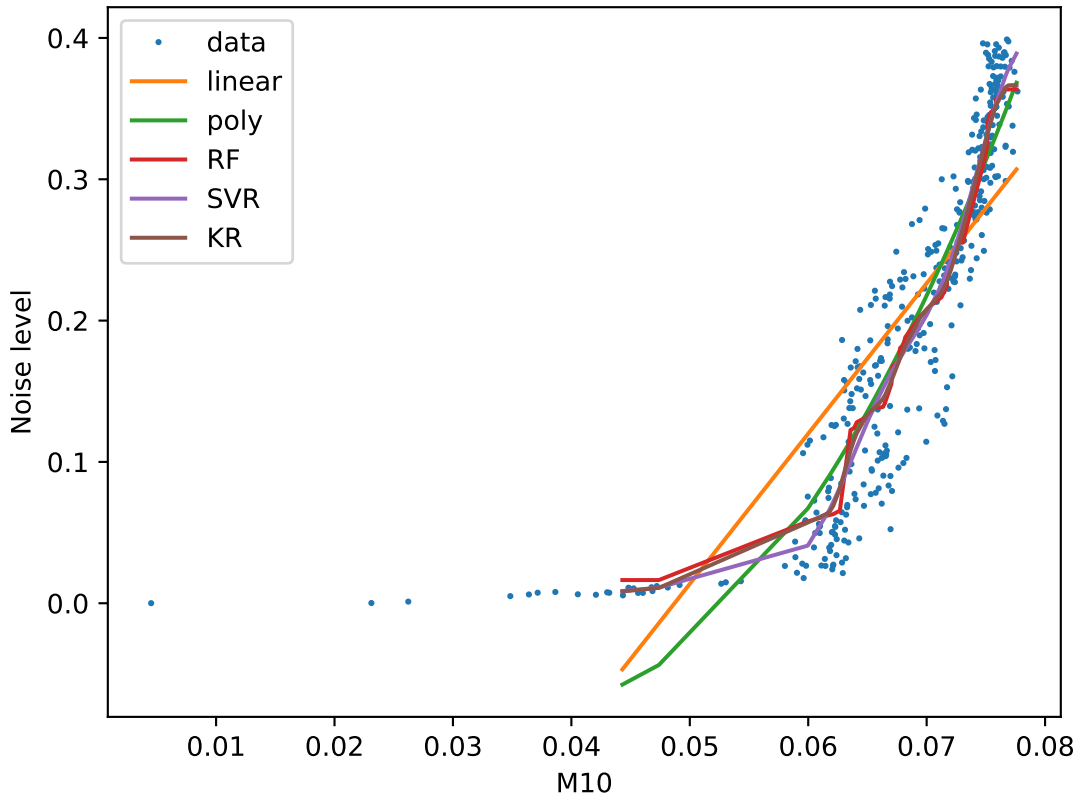

Supplement: s1 [file s1]

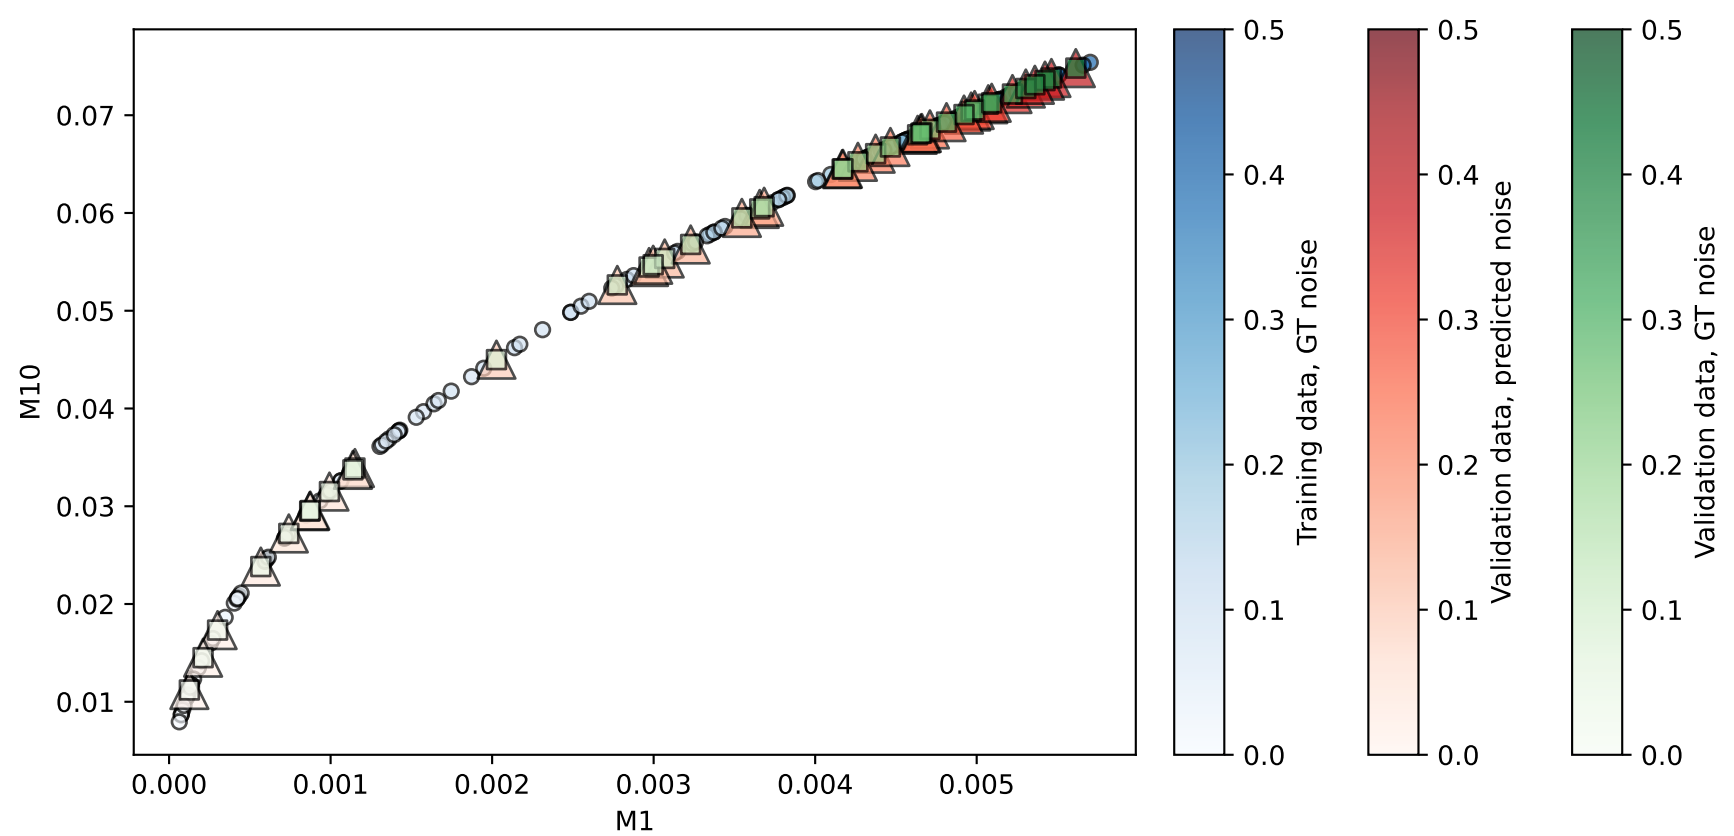

Supplement: s1 [file s1]

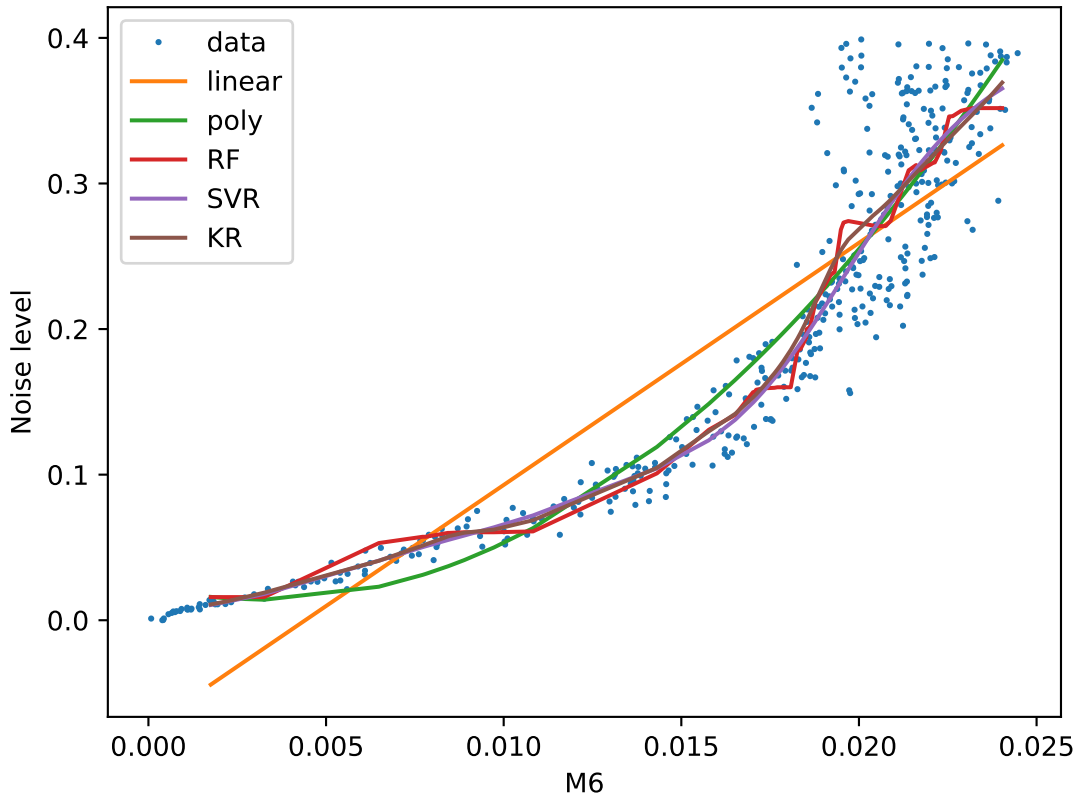

Supplement: s1 [file s1]

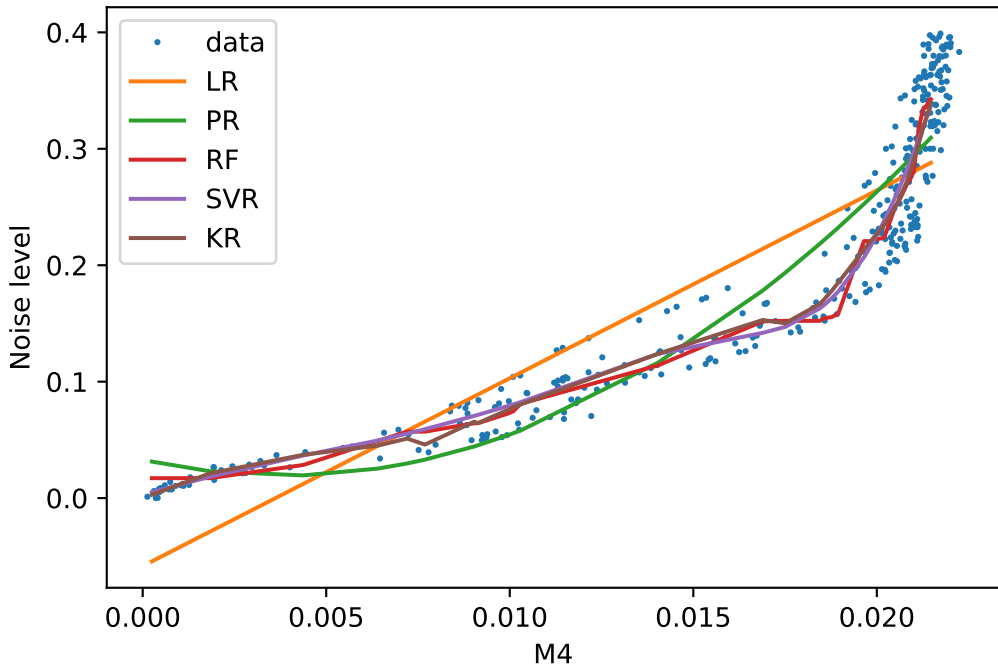

Supplement: s1 [file s1]

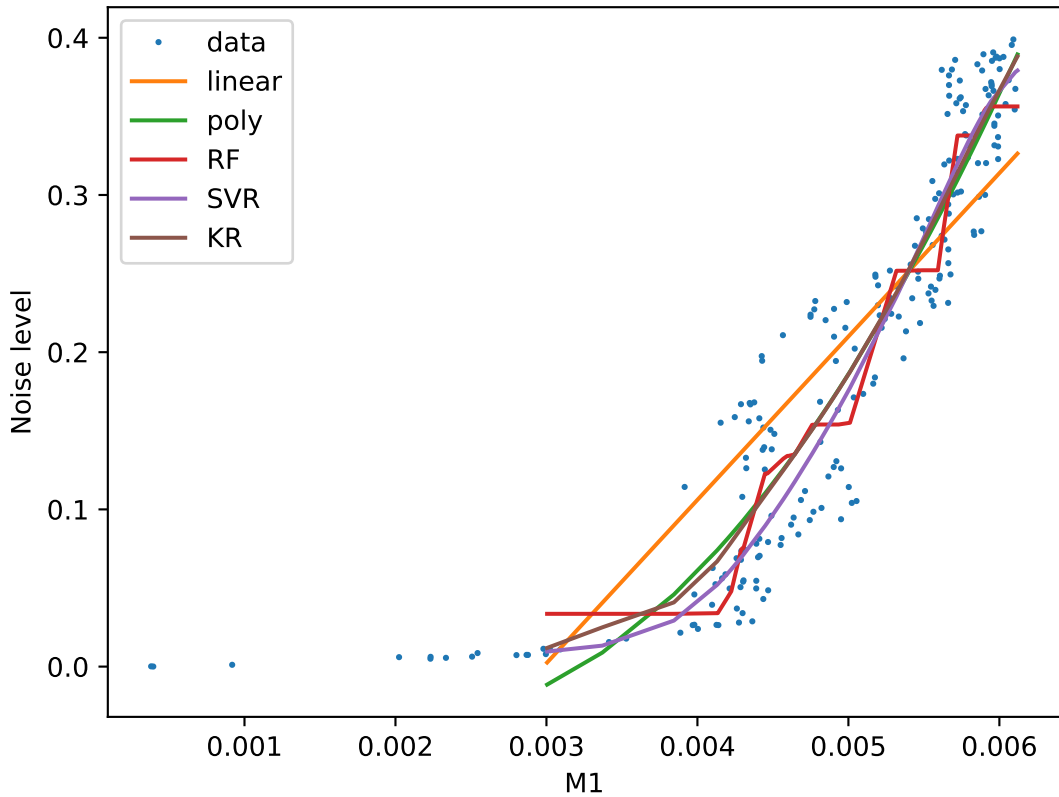

Supplement: s1 [file s1]

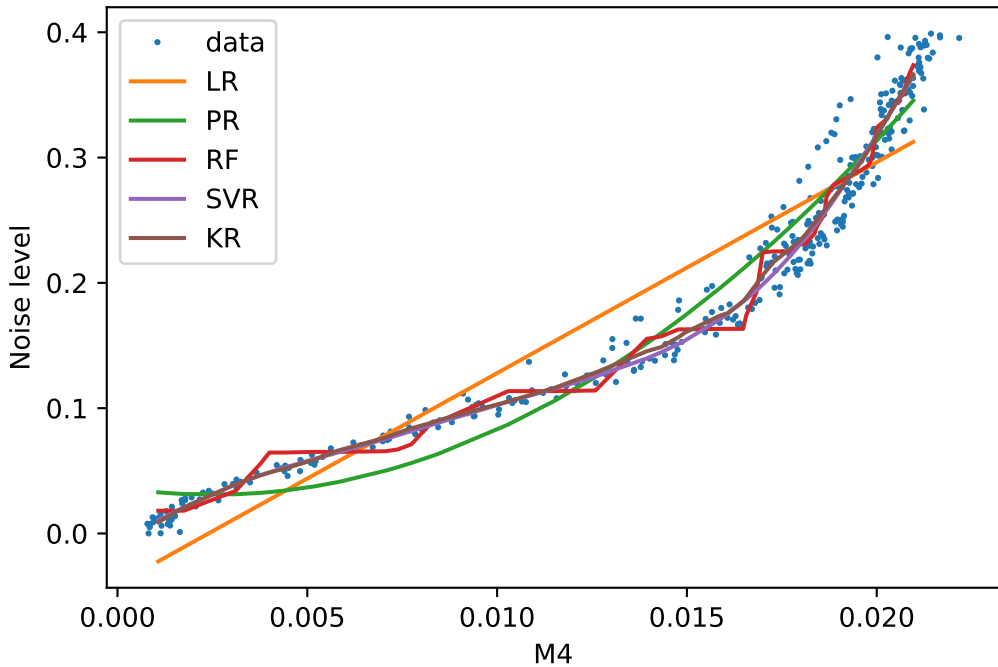

Supplement: s1 [file s1]

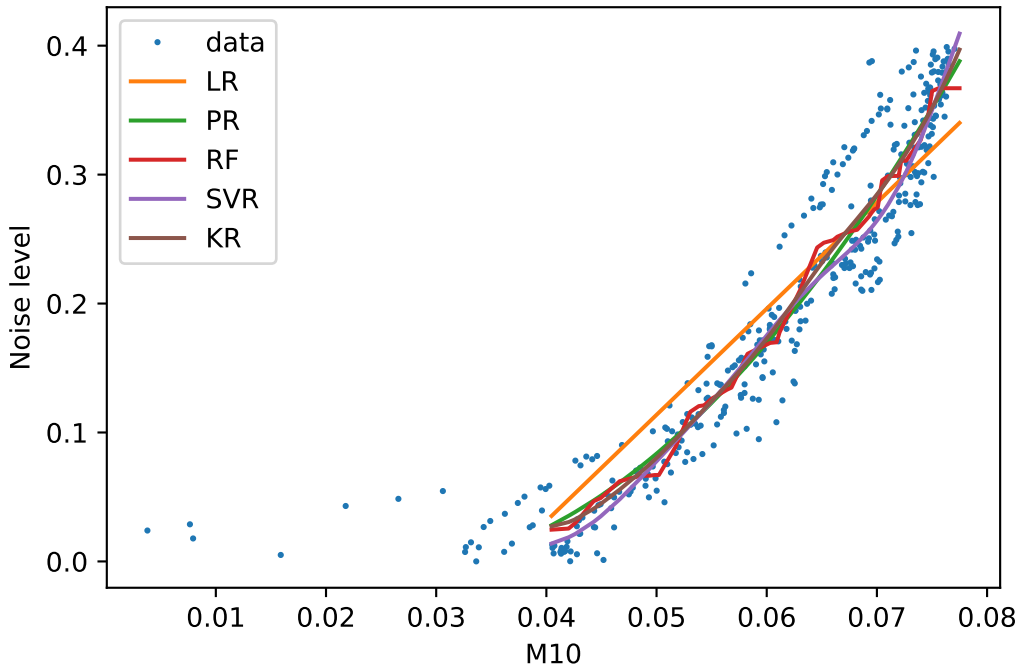

Supplement: s1 [file s1]

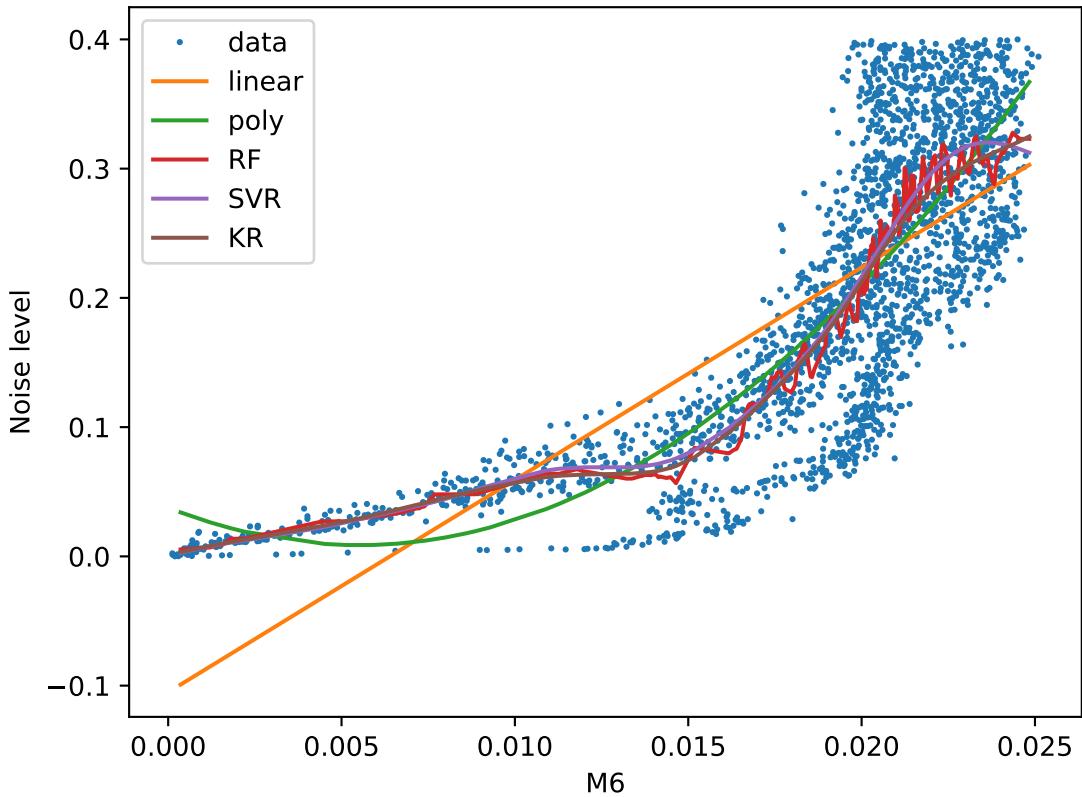

Supplement: s1 [file s1]

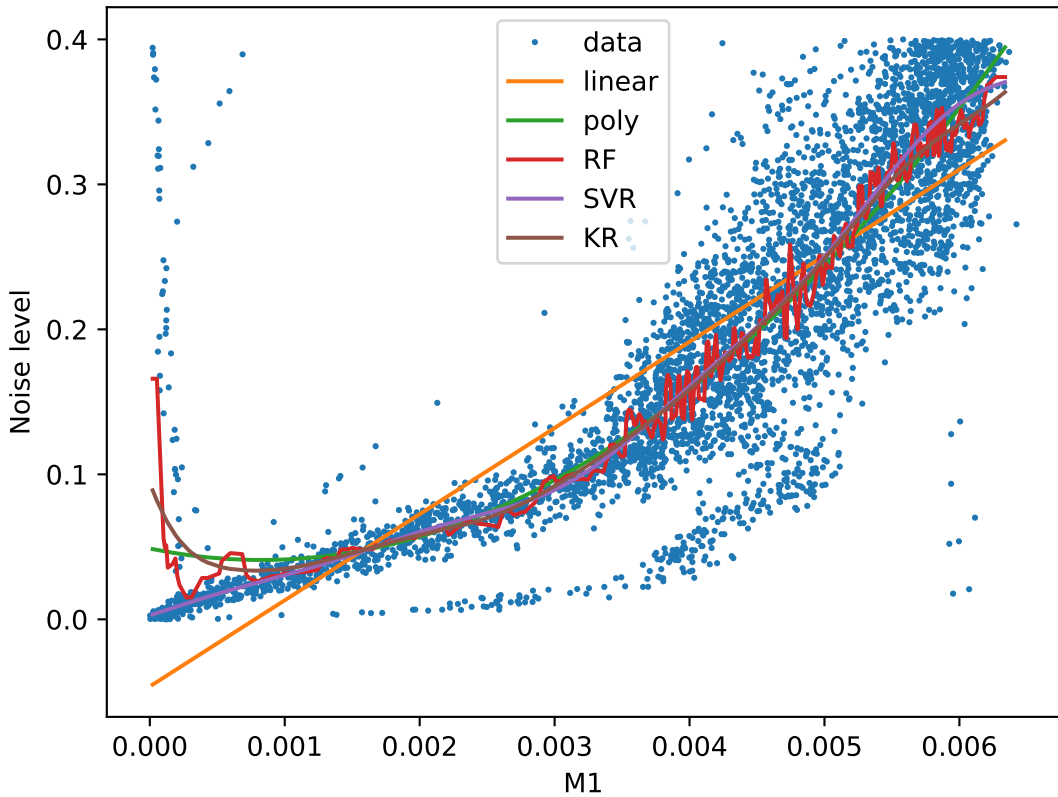

Supplement: s1 [file s1]

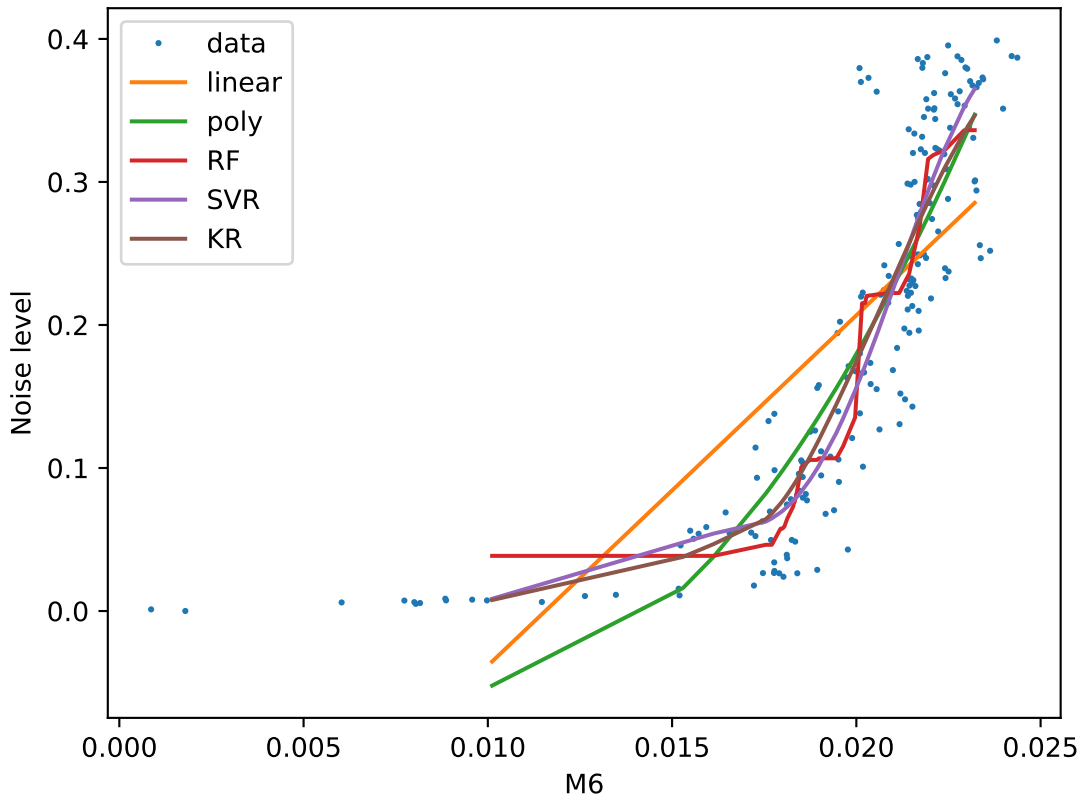

Supplement: s1 [file s1]

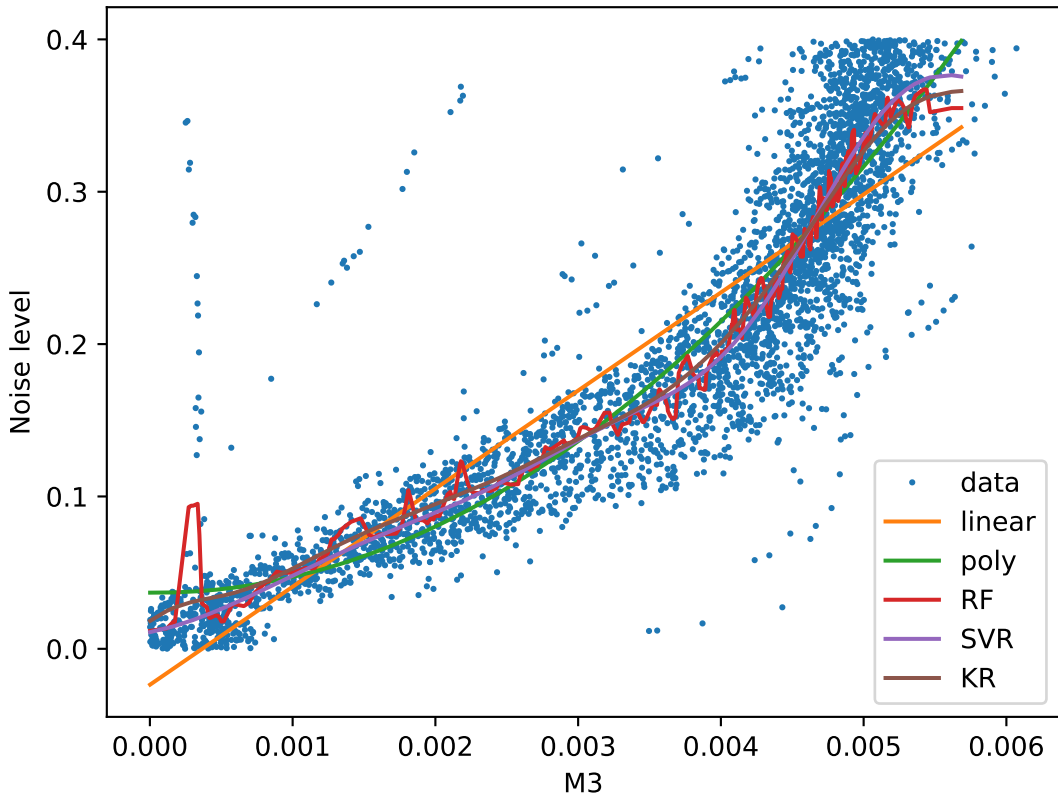

Supplement: s1 [file s1]

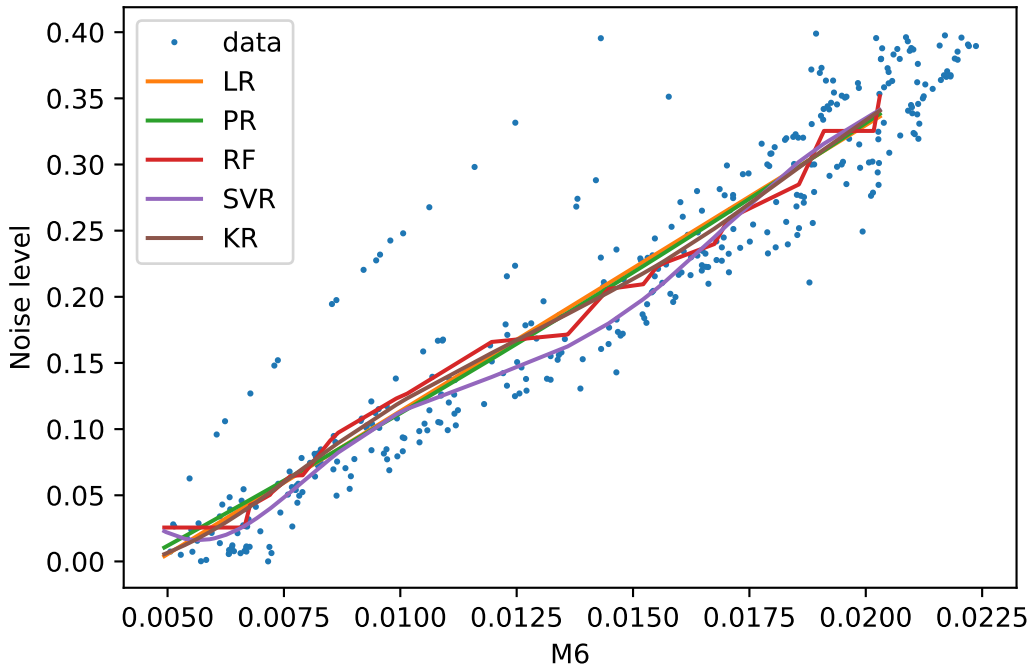

Supplement: s1 [file s1]
